# Supplementary material for: De novo Sequencing and Transcriptome Analysis of Pinellia ternata Identify the Candidate Genes Involved in the Biosynthesis of Benzoic Acid and Ephedrine
Source: Front Plant Sci. 2016 Aug 16;7:1209. doi: 10.3389/fpls.2016.01209 (PMC4986801; doi:10.3389/fpls.2016.01209)
Supplement: Data Sheet 10 — Putative transcription factors encoding unigenes in P. ternata. [file DataSheet10.XLSX]

## Sheet: Sheet1
Data Sheet 10. Putative transcription factors encoding unigenes in P. ternate.
Unigene	Hit	family	E-value	Alignment length	Identity（%）
Unigene0000173	Carica_papaya_evm.TU.supercontig_3.233	C2C2-Dof	9e-24	40	97.5
Unigene0000403	Oryza_sativa_subsp._japonica_LOC_Os05g03884.1	HB	3e-20	41	87.8
Unigene0000404	Oryza_sativa_subsp._japonica_LOC_Os05g03884.1	HB	5e-21	78	80.77
Unigene0000671	Sorghum_bicolor_5044287	Orphans	2e-25	52	82.69
Unigene0000706	Zea_mays_GRMZM2G098443_P01	ABI3VP1	4e-41	65	96.92
Unigene0000720	Sorghum_bicolor_3990925	C2C2-Dof	8e-11	30	83.33
Unigene0000722	Oryza_sativa_subsp._indica_OsIBCD014976	NAC	2e-12	30	80
Unigene0000738	Vitis_vinifera_GSVIVP00032141001	C3H	3e-15	14	85.71
Unigene0000757	Vitis_vinifera_GSVIVP00016010001	LOB	3e-20	34	100
Unigene0000780	Sorghum_bicolor_5053587	bHLH	4e-20	75	80
Unigene0001554	Vitis_vinifera_GSVIVP00034998001	Trihelix	1e-15	34	97.06
Unigene0001740	Arabidopsis_thaliana_AT5G57390.1	AP2-EREBP	5e-39	68	88.24
Unigene0001852	Oryza_sativa_subsp._japonica_LOC_Os12g40890.1	AUX/IAA	1e-32	54	96.3
Unigene0001995	Vitis_vinifera_GSVIVP00019494001	FHA	2e-51	89	85.39
Unigene0002139	Arabidopsis_lyrata_481524	C2C2-YABBY	1e-33	60	90
Unigene0002852	Populus_trichocarpa_594629	HB	5e-22	45	88.89
Unigene0002887	Vitis_vinifera_GSVIVP00023225001	Sigma70-like	3e-38	74	81.08
Unigene0003574	Vitis_vinifera_GSVIVP00000738001	Orphans	7e-15	34	91.18
Unigene0003965	Populus_trichocarpa_177626	MYB	4e-52	90	80
Unigene0004124	Oryza_sativa_subsp._indica_OsIBCD028921	WRKY	9e-12	35	80
Unigene0004209	Vitis_vinifera_GSVIVP00028092001	PHD	1e-35	66	80.3
Unigene0004390	Carica_papaya_evm.TU.supercontig_2145.1	Trihelix	4e-38	78	80.77
Unigene0005229	Oryza_sativa_subsp._japonica_LOC_Os11g05480.1	bZIP	2e-26	76	82.89
Unigene0005316	Sorghum_bicolor_4021208	NAC	7e-67	106	84.91
Unigene0005944	Sorghum_bicolor_5011309	G2-like	5e-11	27	96.3
Unigene0006097	Vitis_vinifera_GSVIVP00011635001	C2C2-Dof	2e-12	35	80
Unigene0006219	Vitis_vinifera_GSVIVP00017130001	AP2-EREBP	8e-57	115	88.7
Unigene0006478	Vitis_vinifera_GSVIVP00014836001	HSF	6e-27	47	95.74
Unigene0006500	Oryza_sativa_subsp._japonica_LOC_Os03g07940.1	AP2-EREBP	2e-49	80	93.75
Unigene0006780	Oryza_sativa_subsp._japonica_LOC_Os06g40960.1	C2H2	2e-35	66	84.85
Unigene0006884	Vitis_vinifera_GSVIVP00007811001	GRAS	7e-30	57	84.21
Unigene0007010	Populus_trichocarpa_715838	HB	3e-30	61	80.33
Unigene0007011	Populus_trichocarpa_715838	HB	1e-11	36	80.56
Unigene0007211	Vitis_vinifera_GSVIVP00032264001	MYB	1e-70	120	85
Unigene0007854	Sorghum_bicolor_5003876	bZIP	2e-34	70	82.86
Unigene0007930	Oryza_sativa_subsp._indica_OsIBCD000513	G2-like	1e-44	104	80.77
Unigene0007980	Zea_mays_GRMZM2G129256_P01	bZIP	1e-27	64	81.25
Unigene0008356	Zea_mays_GRMZM2G179677_P04	C2H2	8e-16	36	88.89
Unigene0008622	Carica_papaya_evm.TU.supercontig_46.119	ARR-B	5e-38	26	84.62
Unigene0008712	Sorghum_bicolor_5053477	WRKY	1e-49	88	88.64
Unigene0008859	Populus_trichocarpa_761334	MYB	3e-69	106	91.51
Unigene0008968	Oryza_sativa_subsp._indica_OsIBCD014976	NAC	3e-56	88	92.05
Unigene0008996	Selaginella_moellendorffii_442384	GRF	2e-12	30	86.67
Unigene0009255	Vitis_vinifera_GSVIVP00025545001	C2H2	2e-73	110	92.73
Unigene0009256	Physcomitrella_patens_143486	C2H2	3e-41	64	96.88
Unigene0009333	Sorghum_bicolor_3992568	MYB	2e-16	37	86.49
Unigene0009700	Vitis_vinifera_GSVIVP00016337001	MYB	3e-69	104	92.31
Unigene0009827	Carica_papaya_evm.TU.supercontig_2.82	C2H2	9e-33	54	83.33
Unigene0009869	Vitis_vinifera_GSVIVP00020178001	SNF2	5e-62	140	85.71
Unigene0010008	Physcomitrella_patens_112131	Orphans	6e-18	46	82.61
Unigene0010035	Zea_mays_GRMZM2G079293_P01	C2C2-YABBY	2e-41	65	95.38
Unigene0010057	Carica_papaya_evm.TU.supercontig_179.21	DDT	3e-12	18	83.33
Unigene0010139	Arabidopsis_thaliana_AT2G02540.1	zf-HD	3e-12	31	80.65
Unigene0010372	Vitis_vinifera_GSVIVP00021659001	Orphans	4e-14	35	82.86
Unigene0010795	Carica_papaya_evm.TU.supercontig_18.1	C2H2	4e-11	30	83.33
Unigene0010809	Zea_mays_GRMZM2G105224_P01	C2H2	3e-18	43	83.72
Unigene0010876	Vitis_vinifera_GSVIVP00020171001	C2H2	2e-22	43	95.35
Unigene0010910	Oryza_sativa_subsp._japonica_LOC_Os03g15440.1	bHLH	8e-54	118	83.05
Unigene0011420	Oryza_sativa_subsp._japonica_LOC_Os09g39660.2	C2H2	3e-11	31	80.65
Unigene0011454	Oryza_sativa_subsp._japonica_LOC_Os03g47730.1	HB	2e-39	70	81.43
Unigene0011565	Arabidopsis_lyrata_331925	MYB	5e-26	50	86
Unigene0011656	Oryza_sativa_subsp._indica_OsIBCD004305	HB	1e-42	100	80
Unigene0012043	Vitis_vinifera_GSVIVP00034038001	C3H	1e-25	71	80.28
Unigene0012094	Oryza_sativa_subsp._indica_OsIBCD017493	WRKY	3e-36	72	80.56
Unigene0012268	Vitis_vinifera_GSVIVP00017128001	SET	1e-41	78	83.33
Unigene0012443	Oryza_sativa_subsp._indica_OsIBCD015983	Orphans	1e-26	55	81.82
Unigene0012493	Zea_mays_GRMZM2G154820_P01	MADS	3e-42	82	81.71
Unigene0012943	Oryza_sativa_subsp._indica_OsIBCD021943	ARF	2e-11	30	86.67
Unigene0013253	Vitis_vinifera_GSVIVP00025490001	C2C2-GATA	8e-43	72	88.89
Unigene0013293	Populus_trichocarpa_419638	GNAT	1e-13	35	80
Unigene0013494	Sorghum_bicolor_5053493	NAC	########	208	84.62
Unigene0013676	Populus_trichocarpa_180523	GRAS	2e-55	104	81.73
Unigene0013759	Zea_mays_GRMZM2G174686_P01	MADS	8e-69	112	95.54
Unigene0014133	Oryza_sativa_subsp._indica_OsIBCD012035	WRKY	2e-49	86	87.21
Unigene0014215	Micromonas_pusilla_CCMP1545_31771	MYB	3e-15	31	100
Unigene0014452	Oryza_sativa_subsp._japonica_LOC_Os03g52239.3	HB	2e-31	60	85
Unigene0014518	Carica_papaya_evm.TU.supercontig_131.86	NAC	4e-15	14	92.86
Unigene0014525	Sorghum_bicolor_4979759	bHLH	9e-30	62	82.26
Unigene0014528	Populus_trichocarpa_776876	GRAS	2e-12	34	85.29
Unigene0014601	Vitis_vinifera_GSVIVP00032972001	MYB	3e-47	78	92.31
Unigene0015014	Carica_papaya_evm.TU.supercontig_941.1	C2C2-GATA	2e-37	61	100
Unigene0015022	Populus_trichocarpa_657051	G2-like	8e-44	78	85.9
Unigene0015046	Vitis_vinifera_GSVIVP00019538001	AP2-EREBP	2e-57	97	89.69
Unigene0015055	Populus_trichocarpa_752763	GRAS	3e-37	69	81.16
Unigene0015056	Populus_trichocarpa_752763	GRAS	3e-36	69	81.16
Unigene0015145	Vitis_vinifera_GSVIVP00034385001	HB	2e-90	166	81.93
Unigene0015195	Selaginella_moellendorffii_67189	bZIP	1e-13	37	89.19
Unigene0015263	Carica_papaya_evm.TU.supercontig_1055.1	MYB-related	1e-36	67	88.06
Unigene0015426	Populus_trichocarpa_584428	HB	3e-22	45	88.89
Unigene0015433	Arabidopsis_thaliana_AT5G56860.1	C2C2-GATA	4e-13	32	84.38
Unigene0015825	Oryza_sativa_subsp._indica_OsIBCD028788	HSF	5e-15	38	84.21
Unigene0016450	Populus_trichocarpa_766132	MYB	6e-39	85	81.18
Unigene0016519	Vitis_vinifera_GSVIVP00026906001	WRKY	2e-55	90	88.89
Unigene0016646	Sorghum_bicolor_4002954	MYB	3e-42	83	83.13
Unigene0016920	Oryza_sativa_subsp._indica_OsIBCD028465	G2-like	1e-16	44	88.64
Unigene0016972	Selaginella_moellendorffii_77868	GNAT	5e-50	100	87
Unigene0017153	Populus_trichocarpa_282058	ARF	3e-63	112	84.82
Unigene0017469	Arabidopsis_thaliana_AT3G19210.1	SNF2	########	205	83.9
Unigene0017470	Vitis_vinifera_GSVIVP00036577001	SNF2	0	323	83.28
Unigene0017593	Selaginella_moellendorffii_72702	bHLH	2e-42	81	86.42
Unigene0017720	Vitis_vinifera_GSVIVP00014644001	C2H2	2e-20	38	97.37
Unigene0017721	Vitis_vinifera_GSVIVP00014644001	C2H2	1e-25	49	91.84
Unigene0017841	Oryza_sativa_subsp._japonica_LOC_Os01g74140.1	WRKY	1e-33	59	88.14
Unigene0017866	Vitis_vinifera_GSVIVP00031356001	AP2-EREBP	1e-20	53	81.13
Unigene0017867	Carica_papaya_evm.TU.supercontig_233.1	AP2-EREBP	4e-78	130	93.85
Unigene0017937	Arabidopsis_lyrata_496913	LOB	2e-13	33	81.82
Unigene0017938	Arabidopsis_lyrata_475666	LOB	2e-41	76	82.89
Unigene0018422	Oryza_sativa_subsp._indica_OsIBCD036761	bHLH	2e-34	91	82.42
Unigene0018441	Vitis_vinifera_GSVIVP00023559001	CCAAT	2e-31	57	87.72
Unigene0018442	Oryza_sativa_subsp._japonica_LOC_Os01g70890.1	CCAAT	5e-11	26	96.15
Unigene0018592	Oryza_sativa_subsp._indica_OsIBCD012106	MYB-related	1e-28	45	95.56
Unigene0018688	Vitis_vinifera_GSVIVP00035356001	zf-HD	4e-35	82	80.49
Unigene0018689	Carica_papaya_evm.TU.supercontig_173.5	zf-HD	4e-34	70	84.29
Unigene0018735	Zea_mays_GRMZM2G140552_P04	Rcd1-like	########	313	82.11
Unigene0018745	Vitis_vinifera_GSVIVP00026788001	Orphans	6e-41	77	84.42
Unigene0019146	Populus_trichocarpa_241272	AUX/IAA	9e-64	113	84.96
Unigene0019183	Populus_trichocarpa_594467	MYB-related	2e-27	58	81.03
Unigene0019303	Oryza_sativa_subsp._indica_OsIBCD006900	HB	3e-27	61	80.33
Unigene0019324	Vitis_vinifera_GSVIVP00016636001	NAC	8e-44	85	83.53
Unigene0019325	Vitis_vinifera_GSVIVP00016636001	NAC	4e-90	174	81.03
Unigene0019406	Carica_papaya_evm.TU.supercontig_21.70	AP2-EREBP	4e-29	76	84.21
Unigene0019460	Oryza_sativa_subsp._indica_OsIBCD000605	MYB-related	7e-39	69	86.96
Unigene0019467	Populus_trichocarpa_565767	SNF2	########	226	90.27
Unigene0019470	Populus_trichocarpa_565767	SNF2	########	268	82.46
Unigene0019515	Oryza_sativa_subsp._japonica_LOC_Os08g39890.1	SBP	8e-39	77	81.82
Unigene0019571	Populus_trichocarpa_413008	Trihelix	7e-18	36	88.89
Unigene0019726	Populus_trichocarpa_576644	CCAAT	7e-59	95	91.58
Unigene0019727	Populus_trichocarpa_576644	CCAAT	2e-59	95	91.58
Unigene0019733	Carica_papaya_evm.TU.supercontig_165.12	NAC	3e-12	29	82.76
Unigene0019734	Carica_papaya_evm.TU.supercontig_165.12	NAC	3e-12	29	82.76
Unigene0019914	Vitis_vinifera_GSVIVP00021274001	C3H	2e-11	32	81.25
Unigene0019995	Oryza_sativa_subsp._indica_OsIBCD021599	WRKY	5e-31	57	87.72
Unigene0020061	Carica_papaya_evm.TU.supercontig_30.34	TCP	5e-37	69	94.2
Unigene0020216	Oryza_sativa_subsp._indica_OsIBCD024606	bZIP	2e-46	96	83.33
Unigene0020217	Selaginella_moellendorffii_77868	GNAT	1e-30	74	85.14
Unigene0020218	Oryza_sativa_subsp._japonica_LOC_Os03g21800.2	bZIP	5e-44	48	83.33
Unigene0020355	Vitis_vinifera_GSVIVP00031464001	C2C2-CO-like	5e-14	35	91.43
Unigene0020356	Carica_papaya_evm.TU.supercontig_70.6	C2C2-CO-like	5e-29	82	81.71
Unigene0020575	Arabidopsis_lyrata_919438	AP2-EREBP	1e-20	76	80.26
Unigene0020628	Vitis_vinifera_GSVIVP00019566001	MYB	3e-20	42	88.1
Unigene0020661	Oryza_sativa_subsp._indica_OsIBCD024103	SNF2	3e-26	13	100
Unigene0021091	Oryza_sativa_subsp._japonica_LOC_Os02g42950.2	C2C2-YABBY	7e-32	68	80.88
Unigene0021146	Sorghum_bicolor_4868630	HB	7e-70	132	82.58
Unigene0021158	Vitis_vinifera_GSVIVP00000038001	TCP	3e-26	53	88.68
Unigene0021206	Arabidopsis_lyrata_477943	SNF2	########	254	85.43
Unigene0021269	Selaginella_moellendorffii_36646	G2-like	2e-43	91	83.52
Unigene0021271	Sorghum_bicolor_5009650	G2-like	8e-33	68	88.24
Unigene0021406	Vitis_vinifera_GSVIVP00019834001	SNF2	4e-34	68	83.82
Unigene0021449	Oryza_sativa_subsp._japonica_LOC_Os02g08310.1	TUB	4e-21	46	84.78
Unigene0021491	Selaginella_moellendorffii_37441	CPP	8e-16	39	82.05
Unigene0021492	Populus_trichocarpa_785914	CPP	1e-38	98	84.69
Unigene0021583	Oryza_sativa_subsp._japonica_LOC_Os04g02140.1	E2F-DP	1e-14	35	94.29
Unigene0021586	Populus_trichocarpa_206330	E2F-DP	5e-11	34	82.35
Unigene0021598	Vitis_vinifera_GSVIVP00035370001	NAC	3e-39	73	87.67
Unigene0021864	Arabidopsis_thaliana_AT5G15850.1	C2C2-CO-like	1e-16	47	80.85
Unigene0021865	Zea_mays_GRMZM2G102882_P03	Orphans	2e-18	44	84.09
Unigene0021935	Carica_papaya_evm.TU.supercontig_131.69	TCP	5e-14	33	90.91
Unigene0021958	Zea_mays_GRMZM2G072582_P03	MADS	2e-17	42	83.33
Unigene0022296	Carica_papaya_evm.TU.supercontig_55.122	SET	########	178	92.13
Unigene0022386	Sorghum_bicolor_4755948	HSF	2e-18	40	90
Unigene0022411	Populus_trichocarpa_179183	SBP	7e-19	39	92.31
Unigene0022477	Populus_trichocarpa_412806	AP2-EREBP	########	238	84.03
Unigene0022584	Arabidopsis_thaliana_AT5G53200.1	MYB-related	1e-30	64	81.25
Unigene0022611	Arabidopsis_thaliana_AT5G11510.2	MYB	4e-73	130	80
Unigene0022702	Selaginella_moellendorffii_9031	TAZ	6e-18	17	82.35
Unigene0022771	Sorghum_bicolor_4762157	WRKY	3e-12	39	82.05
Unigene0022772	Populus_trichocarpa_643201	WRKY	2e-36	66	90.91
Unigene0022998	Arabidopsis_thaliana_AT1G67370.1	SWI/SNF-SWI3	3e-42	72	95.83
Unigene0023009	Carica_papaya_evm.TU.supercontig_58.52	CPP	4e-65	115	83.48
Unigene0023026	Oryza_sativa_subsp._indica_OsIBCD014458	NAC	7e-22	43	90.7
Unigene0023061	Arabidopsis_thaliana_AT1G02065.2	SBP	2e-22	47	80.85
Unigene0023087	Populus_trichocarpa_751129	bHLH	6e-22	47	87.23
Unigene0023107	Vitis_vinifera_GSVIVP00026324001	TCP	7e-28	60	85
Unigene0023116	Populus_trichocarpa_579030	Orphans	7e-25	59	83.05
Unigene0023126	Oryza_sativa_subsp._indica_OsIBCD011332	bHLH	1e-34	74	83.78
Unigene0023239	Arabidopsis_thaliana_AT1G75710.1	C2H2	2e-32	64	89.06
Unigene0023245	Vitis_vinifera_GSVIVP00037942001	bHLH	2e-18	73	82.19
Unigene0023544	Vitis_vinifera_GSVIVP00009657001	AUX/IAA	9e-46	92	81.52
Unigene0023656	Populus_trichocarpa_179090	SBP	6e-22	47	82.98
Unigene0023657	Populus_trichocarpa_179090	SBP	9e-22	47	82.98
Unigene0023659	Vitis_vinifera_GSVIVP00002800001	SBP	2e-19	51	82.35
Unigene0023695	Populus_trichocarpa_750025	Alfin-like	########	216	80.56
Unigene0023758	Vitis_vinifera_GSVIVP00015690001	Jumonji	2e-22	46	89.13
Unigene0023841	Oryza_sativa_subsp._indica_OsIBCD014577	TCP	3e-13	33	84.85
Unigene0023861	Sorghum_bicolor_5003562	ARF	########	215	85.12
Unigene0023975	Arabidopsis_thaliana_AT5G42630.2	G2-like	3e-24	58	81.03
Unigene0024060	Vitis_vinifera_GSVIVP00027720001	SBP	1e-13	41	87.8
Unigene0024061	Vitis_vinifera_GSVIVP00027720001	SBP	4e-34	89	87.64
Unigene0024150	Physcomitrella_patens_88203	G2-like	7e-32	63	85.71
Unigene0024273	Populus_trichocarpa_232345	CCAAT	4e-59	99	89.9
Unigene0024274	Populus_trichocarpa_232345	CCAAT	1e-37	71	88.73
Unigene0024606	Populus_trichocarpa_797543	HB	5e-16	37	86.49
Unigene0024614	Vitis_vinifera_GSVIVP00025360001	SBP	4e-47	96	80.21
Unigene0024616	Physcomitrella_patens_168928	SBP	8e-37	78	80.77
Unigene0024617	Vitis_vinifera_GSVIVP00025360001	SBP	1e-49	95	85.26
Unigene0024619	Vitis_vinifera_GSVIVP00025360001	SBP	5e-48	93	84.95
Unigene0024630	Sorghum_bicolor_5003562	ARF	6e-24	57	82.46
Unigene0024635	Populus_trichocarpa_277204	NAC	1e-39	70	87.14
Unigene0024636	Zea_mays_GRMZM2G008374_P01	NAC	2e-33	75	81.33
Unigene0024666	Sorghum_bicolor_4168609	G2-like	3e-30	59	93.22
Unigene0024667	Sorghum_bicolor_4168609	G2-like	3e-30	59	93.22
Unigene0024668	Arabidopsis_lyrata_898955	bHLH	2e-46	96	81.25
Unigene0024669	Populus_trichocarpa_174909	bHLH	2e-28	72	93.06
Unigene0024779	Vitis_vinifera_GSVIVP00038887001	Alfin-like	########	242	80.58
Unigene0025080	Populus_trichocarpa_655117	AP2-EREBP	5e-87	145	93.1
Unigene0025117	Carica_papaya_evm.TU.supercontig_85.55	Orphans	1e-25	56	83.93
Unigene0025118	Carica_papaya_evm.TU.supercontig_85.55	Orphans	5e-26	55	83.64
Unigene0025151	Vitis_vinifera_GSVIVP00022262001	SRS	5e-35	66	86.36
Unigene0025153	Vitis_vinifera_GSVIVP00022262001	SRS	5e-35	66	86.36
Unigene0025227	Arabidopsis_thaliana_AT1G61660.2	bHLH	1e-32	74	82.43
Unigene0025351	Populus_trichocarpa_419520	LOB	1e-56	118	83.05
Unigene0025379	Oryza_sativa_subsp._indica_OsIBCD033264	C2C2-GATA	5e-91	159	84.28
Unigene0025449	Vitis_vinifera_GSVIVP00026175001	bHLH	6e-24	56	83.93
Unigene0025450	Populus_trichocarpa_410027	bHLH	6e-24	51	84.31
Unigene0025765	Carica_papaya_evm.TU.supercontig_57.33	MYB	2e-70	105	96.19
Unigene0025766	Arabidopsis_lyrata_888197	MYB	1e-32	56	96.43
Unigene0025974	Zea_mays_GRMZM2G035370_P02	G2-like	2e-13	37	83.78
Unigene0025975	Zea_mays_GRMZM2G035370_P04	G2-like	1e-13	37	83.78
Unigene0025976	Sorghum_bicolor_5058074	G2-like	8e-14	38	81.58
Unigene0025978	Vitis_vinifera_GSVIVP00033785001	G2-like	1e-13	37	81.08
Unigene0026023	Vitis_vinifera_GSVIVP00034251001	MED6	########	202	85.64
Unigene0026089	Sorghum_bicolor_5034872	C3H	2e-20	48	85.42
Unigene0026115	Sorghum_bicolor_4123377	MYB	3e-28	57	84.21
Unigene0026116	Populus_trichocarpa_408744	MYB	9e-45	73	93.15
Unigene0026119	Populus_trichocarpa_408744	MYB	2e-53	92	85.87
Unigene0026128	Populus_trichocarpa_287143	WRKY	5e-32	61	83.61
Unigene0026129	Populus_trichocarpa_287143	WRKY	7e-32	61	83.61
Unigene0026304	Sorghum_bicolor_4999259	TCP	4e-36	82	86.59
Unigene0026315	Vitis_vinifera_GSVIVP00030655001	PHD	1e-30	54	81.48
Unigene0026661	Arabidopsis_lyrata_906453	SRS	6e-29	52	90.38
Unigene0026901	Populus_trichocarpa_828115	G2-like	1e-59	115	83.48
Unigene0027026	Vitis_vinifera_GSVIVP00018751001	MBF1	2e-87	142	90.85
Unigene0027110	Populus_trichocarpa_281841	AP2-EREBP	2e-63	134	91.79
Unigene0027510	Sorghum_bicolor_141760	MYB-related	1e-45	93	88.17
Unigene0027511	Vitis_vinifera_GSVIVP00013475001	MYB-related	4e-17	35	94.29
Unigene0027617	Populus_trichocarpa_589324	ARF	0	467	81.16
Unigene0027618	Vitis_vinifera_GSVIVP00030632001	Orphans	3e-31	66	87.88
Unigene0027619	Populus_trichocarpa_421496	Orphans	9e-34	91	83.52
Unigene0027620	Populus_trichocarpa_421496	Orphans	2e-48	115	83.48
Unigene0027651	Zea_mays_GRMZM2G076327_P01	LOB	4e-57	102	80.39
Unigene0027653	Carica_papaya_evm.TU.supercontig_18.114	LOB	1e-39	70	87.14
Unigene0027675	Selaginella_moellendorffii_443366	AP2-EREBP	4e-23	48	81.25
Unigene0027828	Vitis_vinifera_GSVIVP00003430001	HMG	7e-35	68	82.35
Unigene0027941	Vitis_vinifera_GSVIVP00018140001	SWI/SNF-SWI3	0	694	83
Unigene0028237	Selaginella_moellendorffii_9108	C2H2	3e-37	76	80.26
Unigene0028238	Selaginella_moellendorffii_9108	C2H2	2e-37	76	80.26
Unigene0028389	Vitis_vinifera_GSVIVP00030891001	bZIP	9e-56	122	88.52
Unigene0028390	Vitis_vinifera_GSVIVP00030891001	bZIP	3e-58	119	90.76
Unigene0028424	Oryza_sativa_subsp._indica_OsIBCD024040	GNAT	3e-68	137	81.75
Unigene0028427	Sorghum_bicolor_5049202	GNAT	5e-64	123	84.55
Unigene0028519	Populus_trichocarpa_593825	Orphans	5e-96	193	87.56
Unigene0028604	Vitis_vinifera_GSVIVP00034183001	C2H2	1e-23	49	87.76
Unigene0028609	Sorghum_bicolor_4803992	C2H2	7e-24	48	87.5
Unigene0028732	Populus_trichocarpa_286586	HB	1e-68	150	82
Unigene0028733	Populus_trichocarpa_255930	HB	3e-52	122	83.61
Unigene0028734	Vitis_vinifera_GSVIVP00025398001	HB	2e-12	36	86.11
Unigene0028736	Zea_mays_GRMZM2G044752_P03	HB	5e-26	51	88.24
Unigene0028738	Populus_trichocarpa_255930	HB	4e-52	122	83.61
Unigene0028739	Populus_trichocarpa_255930	HB	3e-12	36	83.33
Unigene0028766	Sorghum_bicolor_4806151	MYB	1e-21	43	93.02
Unigene0028767	Oryza_sativa_subsp._indica_OsIBCD000203	MYB	6e-66	119	82.35
Unigene0028935	Oryza_sativa_subsp._japonica_LOC_Os03g03100.1	MADS	3e-22	42	100
Unigene0028971	Selaginella_moellendorffii_437216	BES1	1e-13	50	86
Unigene0028972	Selaginella_moellendorffii_437216	BES1	1e-13	50	86
Unigene0028985	Populus_trichocarpa_803865	Orphans	2e-38	84	80.95
Unigene0028994	Vitis_vinifera_GSVIVP00034355001	AUX/IAA	6e-67	108	87.96
Unigene0029001	Zea_mays_GRMZM2G176568_P01	MYB-related	1e-39	75	86.67
Unigene0029031	Zea_mays_GRMZM2G034252_P01	Tify	3e-19	46	80.43
Unigene0029083	Populus_trichocarpa_419184	ARR-B	5e-17	36	91.67
Unigene0029219	Sorghum_bicolor_4132884	CCAAT	6e-90	145	86.21
Unigene0029220	Sorghum_bicolor_4132884	CCAAT	7e-90	145	86.21
Unigene0029256	Vitis_vinifera_GSVIVP00025314001	TRAF	5e-58	102	94.12
Unigene0029257	Populus_trichocarpa_560428	TRAF	3e-47	96	80.21
Unigene0029400	Carica_papaya_evm.TU.supercontig_91.30	GNAT	2e-83	146	80.82
Unigene0029441	Oryza_sativa_subsp._indica_OsIBCD037104	AP2-EREBP	2e-13	34	82.35
Unigene0029516	Vitis_vinifera_GSVIVP00014644001	C2H2	1e-21	41	97.56
Unigene0029517	Vitis_vinifera_GSVIVP00014644001	C2H2	2e-21	41	97.56
Unigene0029705	Oryza_sativa_subsp._indica_OsIBCD001007	C3H	########	187	90.37
Unigene0029897	Vitis_vinifera_GSVIVP00017700001	bHLH	2e-13	50	80
Unigene0029960	Physcomitrella_patens_39052	HSF	4e-20	47	80.85
Unigene0029963	Vitis_vinifera_GSVIVP00014007001	HSF	4e-49	88	81.82
Unigene0029964	Vitis_vinifera_GSVIVP00015710001	HSF	2e-40	77	84.42
Unigene0030002	Carica_papaya_evm.TU.supercontig_198.18	HB	7e-78	157	81.53
Unigene0030004	Carica_papaya_evm.TU.supercontig_8.217	HB	2e-66	108	87.96
Unigene0030029	Vitis_vinifera_GSVIVP00025649001	SNF2	3e-85	154	92.86
Unigene0030031	Populus_trichocarpa_560465	SNF2	5e-52	105	80.95
Unigene0030033	Populus_trichocarpa_560465	SNF2	########	174	88.51
Unigene0030463	Zea_mays_GRMZM2G169326_P01	GNAT	3e-14	33	87.88
Unigene0030470	Carica_papaya_evm.TU.supercontig_91.26	LUG	5e-28	60	81.67
Unigene0030471	Populus_trichocarpa_819573	LUG	########	218	83.03
Unigene0030481	Arabidopsis_lyrata_910088	Alfin-like	6e-33	86	84.88
Unigene0030482	Oryza_sativa_subsp._indica_OsIBCD024165	Alfin-like	5e-25	49	83.67
Unigene0030483	Oryza_sativa_subsp._indica_OsIBCD024165	Alfin-like	6e-25	49	83.67
Unigene0030497	Vitis_vinifera_GSVIVP00023246001	E2F-DP	2e-12	33	87.88
Unigene0030499	Carica_papaya_evm.TU.supercontig_738.1	E2F-DP	3e-11	27	96.3
Unigene0030542	Oryza_sativa_subsp._japonica_LOC_Os10g20990.1	MYB-related	8e-51	103	81.55
Unigene0030652	Vitis_vinifera_GSVIVP00034355001	AUX/IAA	4e-45	84	83.33
Unigene0030653	Vitis_vinifera_GSVIVP00034355001	AUX/IAA	4e-67	116	83.62
Unigene0030656	Arabidopsis_lyrata_470149	AP2-EREBP	7e-27	52	84.62
Unigene0030799	Vitis_vinifera_GSVIVP00037842001	SWI/SNF-BAF60b	0	404	80.69
Unigene0030853	Oryza_sativa_subsp._indica_OsIBCD008371	LUG	1e-43	69	95.65
Unigene0030858	Populus_trichocarpa_830572	LUG	2e-33	68	80.88
Unigene0030910	Sorghum_bicolor_5028369	bHLH	4e-39	85	80
Unigene0030983	Physcomitrella_patens_60268	zf-HD	4e-27	57	80.7
Unigene0030984	Populus_trichocarpa_209269	zf-HD	1e-20	49	81.63
Unigene0031034	Populus_trichocarpa_208453	C2C2-Dof	8e-25	41	92.68
Unigene0031242	Sorghum_bicolor_4976573	AP2-EREBP	1e-13	29	93.1
Unigene0031256	Arabidopsis_thaliana_AT2G13960.2	MYB-related	5e-38	69	85.51
Unigene0031259	Vitis_vinifera_GSVIVP00033366001	CCAAT	3e-20	44	81.82
Unigene0031536	Populus_trichocarpa_652752	CCAAT	2e-36	75	84
Unigene0031661	Oryza_sativa_subsp._japonica_LOC_Os05g49780.1	CCAAT	7e-61	108	80.56
Unigene0031747	Zea_mays_GRMZM2G127537_P01	HB	2e-58	114	80.7
Unigene0031748	Oryza_sativa_subsp._indica_OsIBCD028731	HB	5e-34	76	80.26
Unigene0031815	Oryza_sativa_subsp._indica_OsIBCD004527	bHLH	5e-21	50	82
Unigene0031960	Oryza_sativa_subsp._indica_OsIBCD029547	BBR/BPC	8e-57	106	82.08
Unigene0031962	Arabidopsis_lyrata_315244	NAC	6e-55	90	83.33
Unigene0031963	Sorghum_bicolor_4998165	NAC	8e-75	123	82.93
Unigene0032182	Vitis_vinifera_GSVIVP00033165001	WRKY	9e-38	68	86.76
Unigene0032235	Oryza_sativa_subsp._indica_OsIBCD027435	AP2-EREBP	3e-12	34	82.35
Unigene0032262	Populus_trichocarpa_282523	GRAS	5e-64	131	88.55
Unigene0032318	Carica_papaya_evm.TU.supercontig_128.39	G2-like	1e-11	30	83.33
Unigene0032357	Carica_papaya_evm.TU.supercontig_91.26	LUG	4e-26	120	81.67
Unigene0032364	Zea_mays_GRMZM2G060894_P02	LUG	8e-53	82	96.34
Unigene0032431	Populus_trichocarpa_253757	TCP	1e-20	42	85.71
Unigene0032507	Arabidopsis_thaliana_AT3G16600.1	SNF2	4e-22	49	89.8
Unigene0032509	Populus_trichocarpa_552367	MYB-related	4e-37	68	85.29
Unigene0032510	Oryza_sativa_subsp._indica_OsIBCD025043	MYB-related	2e-18	50	80
Unigene0032513	Arabidopsis_thaliana_AT2G24790.1	C2C2-CO-like	2e-16	38	94.74
Unigene0032514	Arabidopsis_thaliana_AT2G24790.1	C2C2-CO-like	4e-17	38	94.74
Unigene0032660	Vitis_vinifera_GSVIVP00010539001	FHA	7e-71	125	88
Unigene0032720	Vitis_vinifera_GSVIVP00024996001	BES1	3e-13	35	88.57
Unigene0032764	Populus_trichocarpa_641182	MYB-related	2e-15	39	84.62
Unigene0032780	Populus_trichocarpa_831731	PLATZ	7e-58	100	84
Unigene0032836	Vitis_vinifera_GSVIVP00022384001	bHLH	5e-31	64	87.5
Unigene0033102	Oryza_sativa_subsp._japonica_LOC_Os07g49210.1	SNF2	2e-23	44	90.91
Unigene0033145	Populus_trichocarpa_563735	C2C2-GATA	1e-22	49	85.71
Unigene0033166	Vitis_vinifera_GSVIVP00009657001	AUX/IAA	3e-70	132	84.09
Unigene0033237	Vitis_vinifera_GSVIVP00017695001	bHLH	4e-49	93	82.8
Unigene0033339	Physcomitrella_patens_29422	SBP	5e-27	59	81.36
Unigene0033389	Zea_mays_GRMZM2G078274_P03	ARF	1e-38	68	92.65
Unigene0033390	Populus_trichocarpa_198791	ARF	1e-23	51	86.27
Unigene0033391	Vitis_vinifera_GSVIVP00023445001	ARF	2e-16	44	84.09
Unigene0033393	Vitis_vinifera_GSVIVP00023445001	ARF	0	334	84.73
Unigene0033563	Arabidopsis_thaliana_AT1G51060.1	CCAAT	1e-54	133	91.73
Unigene0033564	Carica_papaya_evm.TU.supercontig_190.22	CCAAT	4e-56	127	88.19
Unigene0033565	Populus_trichocarpa_729700	CCAAT	8e-22	49	81.63
Unigene0033566	Populus_trichocarpa_729700	CCAAT	2e-40	96	93.75
Unigene0033800	Oryza_sativa_subsp._japonica_LOC_Os03g45194.1	G2-like	3e-34	65	81.54
Unigene0033977	Physcomitrella_patens_26902	WRKY	6e-28	61	80.33
Unigene0034022	Vitis_vinifera_GSVIVP00027865001	BES1	6e-25	74	89.19
Unigene0034058	Vitis_vinifera_GSVIVP00015901001	C2H2	7e-88	159	81.76
Unigene0034059	Arabidopsis_thaliana_AT3G48430.1	C2H2	6e-61	114	83.33
Unigene0034060	Sorghum_bicolor_4995736	Jumonji	1e-27	62	82.26
Unigene0034108	Vitis_vinifera_GSVIVP00007730001	SWI/SNF-BAF60b	2e-42	80	80
Unigene0034178	Populus_trichocarpa_209677	ABI3VP1	2e-15	34	82.35
Unigene0034251	Carica_papaya_evm.TU.supercontig_75.109	SWI/SNF-BAF60b	7e-22	43	95.35
Unigene0034273	Sorghum_bicolor_4889237	GNAT	9e-97	152	89.47
Unigene0034487	Arabidopsis_thaliana_AT1G51700.1	C2C2-Dof	1e-19	37	91.89
Unigene0034502	Populus_trichocarpa_814069	CCAAT	7e-37	72	81.94
Unigene0034547	Oryza_sativa_subsp._indica_OsIBCD028544	zf-HD	5e-11	54	83.33
Unigene0034938	Vitis_vinifera_GSVIVP00017926001	FHA	2e-99	180	87.22
Unigene0035013	Populus_trichocarpa_829549	Orphans	0	514	82.1
Unigene0035087	Carica_papaya_evm.TU.supercontig_147.26	TRAF	########	233	84.98
Unigene0035202	Populus_trichocarpa_576644	CCAAT	8e-67	130	80
Unigene0035205	Oryza_sativa_subsp._japonica_LOC_Os05g38820.5	CCAAT	2e-63	109	88.99
Unigene0035221	Zea_mays_GRMZM2G033185_P01	HB	4e-41	78	82.05
Unigene0035224	Vitis_vinifera_GSVIVP00023938001	bZIP	5e-55	120	80.83
Unigene0035375	Populus_trichocarpa_820938	MYB-related	1e-50	79	94.94
Unigene0035376	Carica_papaya_evm.TU.supercontig_16.131	SNF2	2e-21	45	97.78
Unigene0035377	Populus_trichocarpa_820938	MYB-related	1e-18	38	97.37
Unigene0035379	Populus_trichocarpa_820938	MYB-related	7e-75	155	83.23
Unigene0035399	Vitis_vinifera_GSVIVP00016585001	MYB-related	2e-37	71	87.32
Unigene0035496	Populus_trichocarpa_171407	SNF2	3e-64	104	95.19
Unigene0035499	Carica_papaya_evm.TU.supercontig_34.18	SNF2	########	240	82.5
Unigene0035500	Oryza_sativa_subsp._indica_OsIBCD007612	SNF2	9e-30	57	92.98
Unigene0035502	Populus_trichocarpa_171407	SNF2	########	169	95.86
Unigene0035758	Oryza_sativa_subsp._indica_OsIBCD000751	SET	########	233	82.83
Unigene0035764	Carica_papaya_evm.TU.supercontig_20.18	C2C2-GATA	1e-12	30	90
Unigene0035877	Sorghum_bicolor_4980182	AP2-EREBP	8e-22	60	88.33
Unigene0035879	Populus_trichocarpa_754573	TRAF	8e-17	37	81.08
Unigene0035896	Oryza_sativa_subsp._indica_OsIBCD001007	C3H	########	185	86.49
Unigene0035911	Oryza_sativa_subsp._japonica_LOC_Os01g08320.1	AUX/IAA	5e-14	38	81.58
Unigene0035914	Oryza_sativa_subsp._japonica_LOC_Os01g08320.1	AUX/IAA	3e-16	36	88.89
Unigene0035998	Physcomitrella_patens_128885	MYB	2e-62	108	85.19
Unigene0036150	Oryza_sativa_subsp._indica_OsIBCD018389	GNAT	1e-52	93	84.95
Unigene0036215	Arabidopsis_thaliana_AT1G32640.1	bHLH	8e-28	62	85.48
Unigene0036499	Vitis_vinifera_GSVIVP00017606001	CCAAT	1e-74	123	86.99
Unigene0036500	Vitis_vinifera_GSVIVP00017606001	CCAAT	3e-12	37	83.78
Unigene0036519	Oryza_sativa_subsp._indica_OsIBCD001007	C3H	3e-78	120	94.17
Unigene0036616	Vitis_vinifera_GSVIVP00034010001	AP2-EREBP	1e-13	36	86.11
Unigene0036641	Physcomitrella_patens_28478	bHLH	7e-14	34	88.24
Unigene0036642	Vitis_vinifera_GSVIVP00017698001	MYB	5e-28	50	90
Unigene0036646	Sorghum_bicolor_4806151	MYB	6e-39	67	88.06
Unigene0036647	Zea_mays_GRMZM2G130149_P04	MYB	2e-16	41	82.93
Unigene0036648	Zea_mays_GRMZM2G130149_P06	MYB-related	5e-46	78	92.31
Unigene0036649	Zea_mays_GRMZM2G130149_P04	MYB	5e-53	79	91.14
Unigene0036673	Vitis_vinifera_GSVIVP00032990001	GRAS	2e-53	99	80.81
Unigene0036675	Vitis_vinifera_GSVIVP00032990001	GRAS	1e-53	99	80.81
Unigene0036723	Populus_trichocarpa_712010	bZIP	7e-21	50	84
Unigene0036725	Vitis_vinifera_GSVIVP00030891001	bZIP	########	243	85.19
Unigene0036870	Zea_mays_GRMZM2G060894_P02	LUG	1e-53	86	95.35
Unigene0036871	Populus_trichocarpa_819573	LUG	########	272	84.56
Unigene0036876	Carica_papaya_evm.TU.supercontig_91.26	LUG	2e-39	86	82.56
Unigene0036891	Arabidopsis_thaliana_AT2G19810.1	C3H	6e-72	135	80.74
Unigene0036892	Vitis_vinifera_GSVIVP00032141001	C3H	1e-72	137	80.29
Unigene0036893	Vitis_vinifera_GSVIVP00032141001	C3H	2e-73	137	80.29
Unigene0037149	Oryza_sativa_subsp._indica_OsIBCD005786	WRKY	1e-22	45	86.67
Unigene0037150	Carica_papaya_evm.TU.supercontig_768.1	WRKY	2e-16	26	92.31
Unigene0037151	Sorghum_bicolor_4756235	WRKY	6e-14	35	82.86
Unigene0037230	Vitis_vinifera_GSVIVP00025930001	HB	4e-31	84	86.9
Unigene0037231	Vitis_vinifera_GSVIVP00015017001	HB	3e-71	143	85.31
Unigene0037391	Vitis_vinifera_GSVIVP00017021001	ARF	2e-39	83	81.93
Unigene0037395	Oryza_sativa_subsp._japonica_LOC_Os06g48950.1	ARF	2e-81	162	82.72
Unigene0037491	Zea_mays_GRMZM2G174686_P01	MADS	6e-45	84	84.52
Unigene0037494	Zea_mays_GRMZM2G174686_P01	MADS	4e-41	84	80.95
Unigene0037496	Zea_mays_GRMZM2G174686_P01	MADS	3e-41	84	80.95
Unigene0037502	Zea_mays_GRMZM2G174686_P01	MADS	9e-43	84	80.95
Unigene0037509	Zea_mays_GRMZM2G174686_P01	MADS	9e-42	84	80.95
Unigene0037520	Vitis_vinifera_GSVIVP00031221001	SWI/SNF-SWI3	1e-21	50	82
Unigene0037524	Carica_papaya_evm.TU.supercontig_80.104	SWI/SNF-SWI3	1e-14	37	83.78
Unigene0037530	Sorghum_bicolor_5054477	C2C2-GATA	6e-15	34	85.29
Unigene0037674	Vitis_vinifera_GSVIVP00025867001	TRAF	5e-90	166	81.93
Unigene0037676	Arabidopsis_thaliana_AT2G04740.1	TRAF	6e-56	124	83.06
Unigene0037723	Populus_trichocarpa_424416	C3H	1e-60	118	85.59
Unigene0037751	Arabidopsis_thaliana_AT5G25220.2	HB	########	258	87.21
Unigene0037803	Sorghum_bicolor_4888514	AP2-EREBP	4e-27	67	92.54
Unigene0037934	Arabidopsis_lyrata_907942	C3H	4e-28	56	85.71
Unigene0037938	Oryza_sativa_subsp._japonica_LOC_Os02g08440.3	WRKY	7e-16	35	91.43
Unigene0037972	Populus_trichocarpa_204506	MYB	1e-78	118	91.53
Unigene0038093	Vitis_vinifera_GSVIVP00035312001	FAR1	0	329	80.24
Unigene0038106	Carica_papaya_evm.TU.supercontig_51.103	PHD	1e-25	45	95.56
Unigene0038168	Populus_trichocarpa_177109	Trihelix	2e-40	84	82.14
Unigene0038245	Carica_papaya_evm.TU.supercontig_2216.1	C3H	0	365	80
Unigene0038246	Carica_papaya_evm.TU.supercontig_2216.1	C3H	########	86	87.21
Unigene0038893	Oryza_sativa_subsp._indica_OsIBCD001007	C3H	########	193	84.97
Unigene0038898	Carica_papaya_evm.TU.supercontig_89.64	MYB-related	7e-14	28	89.29
Unigene0038899	Physcomitrella_patens_77601	MYB-related	8e-32	67	82.09
Unigene0039045	Vitis_vinifera_GSVIVP00009253001	HB	6e-54	110	81.82
Unigene0039084	Oryza_sativa_subsp._japonica_LOC_Os02g42950.2	C2C2-YABBY	3e-29	59	86.44
Unigene0039211	Vitis_vinifera_GSVIVP00031190001	bHLH	6e-54	160	81.88
Unigene0039222	Populus_trichocarpa_226173	WRKY	6e-45	79	84.81
Unigene0039225	Sorghum_bicolor_5057401	GNAT	0	263	96.96
Unigene0039226	Populus_trichocarpa_776218	GNAT	3e-21	59	93.22
Unigene0039238	Oryza_sativa_subsp._indica_OsIBCD001007	C3H	2e-47	92	80.43
Unigene0039386	Zea_mays_GRMZM2G047813_P01	CCAAT	1e-24	55	80
Unigene0039387	Zea_mays_GRMZM2G047813_P01	CCAAT	1e-24	55	80
Unigene0039389	Zea_mays_GRMZM2G047813_P01	CCAAT	1e-24	55	80
Unigene0039390	Zea_mays_GRMZM2G047813_P01	CCAAT	9e-25	55	80
Unigene0039392	Oryza_sativa_subsp._japonica_LOC_Os03g52239.2	HB	########	176	88.07
Unigene0039393	Populus_trichocarpa_268609	CCAAT	7e-15	53	92.45
Unigene0039798	Populus_trichocarpa_832575	LIM	########	188	89.36
Unigene0039799	Populus_trichocarpa_832575	LIM	########	188	89.36
Unigene0039824	Oryza_sativa_subsp._indica_OsIBCD001039	C3H	9e-52	88	96.59
Unigene0039834	Arabidopsis_thaliana_AT4G32890.1	C2C2-GATA	7e-16	35	85.71
Unigene0039838	Selaginella_moellendorffii_81112	MYB	3e-69	116	87.93
Unigene0039843	Selaginella_moellendorffii_81112	MYB	1e-46	85	87.06
Unigene0039844	Selaginella_moellendorffii_81112	MYB	9e-47	85	87.06
Unigene0039846	Populus_trichocarpa_204135	MYB	8e-76	119	85.71
Unigene0039930	Zea_mays_GRMZM2G125969_P02	HSF	1e-38	72	83.33
Unigene0040023	Vitis_vinifera_GSVIVP00030338001	C2C2-CO-like	1e-24	54	83.33
Unigene0040024	Vitis_vinifera_GSVIVP00030338001	C2C2-CO-like	2e-24	54	83.33
Unigene0040172	Arabidopsis_lyrata_328082	Orphans	7e-11	31	83.87
Unigene0040623	Zea_mays_GRMZM2G106252_P02	Trihelix	2e-14	36	88.89
Unigene0040624	Arabidopsis_lyrata_888711	Trihelix	3e-13	38	81.58
Unigene0040689	Vitis_vinifera_GSVIVP00016178001	Orphans	7e-14	40	82.5
Unigene0000035	Populus_trichocarpa_589460	TCP	9e-16	37	86.49
Unigene0041021	Zea_mays_GRMZM2G091044_P01	PLATZ	4e-17	39	82.05
Unigene0041077	Selaginella_moellendorffii_233860	C2H2	1e-48	86	88.37
Unigene0041094	Zea_mays_GRMZM2G028766_P02	C2H2	4e-76	162	82.1
Unigene0041095	Zea_mays_GRMZM2G028766_P02	C2H2	8e-12	77	80.52
Unigene0041225	Oryza_sativa_subsp._japonica_LOC_Os06g08140.1	DBP	3e-44	78	84.62
Unigene0041285	Arabidopsis_thaliana_AT3G57130.1	TRAF	2e-18	45	84.44
Unigene0041405	Oryza_sativa_subsp._japonica_LOC_Os10g14040.1	FAR1	1e-18	46	86.96
Unigene0041406	Oryza_sativa_subsp._japonica_LOC_Os10g14040.1	FAR1	5e-18	43	88.37
Unigene0041407	Oryza_sativa_subsp._japonica_LOC_Os10g14040.1	FAR1	4e-18	43	88.37
Unigene0041409	Oryza_sativa_subsp._japonica_LOC_Os10g14040.1	FAR1	1e-18	46	86.96
Unigene0041635	Oryza_sativa_subsp._indica_OsIBCD001007	C3H	0	372	89.52
Unigene0041734	Carica_papaya_evm.TU.supercontig_5.187	TRAF	########	298	83.89
Unigene0041978	Vitis_vinifera_GSVIVP00014964001	LIM	########	181	85.08
Unigene0041983	Selaginella_moellendorffii_135978	bZIP	4e-17	49	81.63
Unigene0042068	Carica_papaya_evm.TU.supercontig_184.4	TRAF	########	173	89.02
Unigene0042113	Oryza_sativa_subsp._indica_OsIBCD035626	bHLH	2e-34	78	83.33
Unigene0042162	Arabidopsis_thaliana_AT5G20510.1	Alfin-like	1e-32	58	84.48
Unigene0042163	Arabidopsis_thaliana_AT5G20510.1	Alfin-like	6e-33	58	84.48
Unigene0042173	Zea_mays_GRMZM2G134372_P01	HB	1e-74	130	84.62
Unigene0042236	Populus_trichocarpa_657649	TRAF	5e-82	134	87.31
Unigene0042309	Vitis_vinifera_GSVIVP00017926001	FHA	########	282	90.78
Unigene0042520	Oryza_sativa_subsp._japonica_LOC_Os04g32620.1	AP2-EREBP	7e-31	79	89.87
Unigene0042683	Populus_trichocarpa_218986	HB	6e-70	130	87.69
Unigene0042684	Populus_trichocarpa_218986	HB	5e-70	130	87.69
Unigene0042694	Populus_trichocarpa_555506	ABI3VP1	3e-12	40	80
Unigene0042699	Populus_trichocarpa_555506	ABI3VP1	4e-12	40	80
Unigene0042701	Populus_trichocarpa_555506	ABI3VP1	4e-12	40	80
Unigene0042738	Oryza_sativa_subsp._indica_OsIBCD030516	HB	7e-17	44	84.09
Unigene0042907	Carica_papaya_evm.TU.supercontig_73.13	MYB	1e-78	130	84.62
Unigene0042908	Carica_papaya_evm.TU.supercontig_73.13	MYB	2e-78	130	84.62
Unigene0042940	Carica_papaya_evm.TU.supercontig_216.25	C2H2	4e-30	55	89.09
Unigene0042941	Vitis_vinifera_GSVIVP00014644001	C2H2	1e-33	58	91.38
Unigene0043126	Sorghum_bicolor_5049202	GNAT	########	190	83.16
Unigene0043331	Carica_papaya_evm.TU.supercontig_212.3	bHLH	2e-36	80	81.25
Unigene0043385	Vitis_vinifera_GSVIVP00011492001	MADS	1e-45	72	98.61
Unigene0043496	Zea_mays_GRMZM2G095571_P01	C2C2-GATA	5e-25	52	90.38
Unigene0043547	Selaginella_moellendorffii_88108	ABI3VP1	1e-30	62	87.1
Unigene0043665	Populus_trichocarpa_419568	MYB	5e-37	64	89.06
Unigene0043666	Populus_trichocarpa_419568	MYB	4e-37	64	89.06
Unigene0043705	Oryza_sativa_subsp._indica_OsIBCD026632	NAC	1e-27	54	87.04
Unigene0043706	Oryza_sativa_subsp._indica_OsIBCD026632	NAC	3e-27	54	87.04
Unigene0043707	Oryza_sativa_subsp._indica_OsIBCD026632	NAC	3e-27	54	87.04
Unigene0043708	Oryza_sativa_subsp._indica_OsIBCD026632	NAC	7e-27	54	87.04
Unigene0043830	Vitis_vinifera_GSVIVP00031646001	bHLH	1e-57	116	84.48
Unigene0043831	Vitis_vinifera_GSVIVP00031646001	bHLH	2e-57	116	84.48
Unigene0043832	Vitis_vinifera_GSVIVP00031646001	bHLH	2e-57	116	84.48
Unigene0043833	Vitis_vinifera_GSVIVP00031646001	bHLH	3e-57	116	84.48
Unigene0044138	Zea_mays_GRMZM2G085964_P02	AP2-EREBP	2e-18	59	89.83
Unigene0044139	Zea_mays_GRMZM2G085964_P02	AP2-EREBP	3e-18	59	89.83
Unigene0044141	Zea_mays_GRMZM2G085964_P02	AP2-EREBP	1e-18	59	89.83
Unigene0044143	Zea_mays_GRMZM2G085964_P02	AP2-EREBP	2e-18	59	89.83
Unigene0044144	Zea_mays_GRMZM2G085964_P02	AP2-EREBP	2e-18	59	89.83
Unigene0044158	Populus_trichocarpa_207634	Jumonji	1e-18	48	83.33
Unigene0044159	Populus_trichocarpa_207634	Jumonji	1e-18	48	83.33
Unigene0044161	Populus_trichocarpa_207634	Jumonji	2e-18	48	83.33
Unigene0044284	Vitis_vinifera_GSVIVP00022983001	Sigma70-like	########	235	91.49
Unigene0044406	Zea_mays_GRMZM2G148087_P01	WRKY	3e-58	24	95.83
Unigene0044410	Vitis_vinifera_GSVIVP00009657001	AUX/IAA	1e-69	135	82.22
Unigene0044495	Vitis_vinifera_GSVIVP00006008001	SNF2	1e-90	165	82.42
Unigene0044653	Populus_trichocarpa_573000	PHD	########	217	90.78
Unigene0044698	Vitis_vinifera_GSVIVP00036383001	mTERF	3e-63	128	82.03
Unigene0044919	Zea_mays_GRMZM2G053311_P02	TUB	1e-12	32	81.25
Unigene0044920	Populus_trichocarpa_801331	TUB	8e-76	124	85.48
Unigene0044939	Populus_trichocarpa_419470	G2-like	5e-12	33	81.82
Unigene0045027	Vitis_vinifera_GSVIVP00008087001	SWI/SNF-BAF60b	6e-19	46	80.43
Unigene0045028	Vitis_vinifera_GSVIVP00008087001	SWI/SNF-BAF60b	1e-27	54	85.19
Unigene0045029	Vitis_vinifera_GSVIVP00008087001	SWI/SNF-BAF60b	8e-28	54	85.19
Unigene0045043	Vitis_vinifera_GSVIVP00023994001	WRKY	6e-27	60	81.67
Unigene0045086	Carica_papaya_evm.TU.supercontig_50.28	AP2-EREBP	1e-25	58	81.03
Unigene0045087	Carica_papaya_evm.TU.supercontig_50.28	AP2-EREBP	1e-25	58	81.03
Unigene0045206	Oryza_sativa_subsp._indica_OsIBCD001007	C3H	0	368	80.98
Unigene0045207	Oryza_sativa_subsp._indica_OsIBCD001007	C3H	0	365	80.82
Unigene0045266	Vitis_vinifera_GSVIVP00027438001	CCAAT	3e-52	116	89.66
Unigene0045267	Vitis_vinifera_GSVIVP00027438001	CCAAT	4e-50	111	90.09
Unigene0045268	Carica_papaya_evm.TU.supercontig_190.22	CCAAT	1e-57	125	89.6
Unigene0045269	Populus_trichocarpa_729700	CCAAT	8e-13	32	90.63
Unigene0045314	Arabidopsis_lyrata_892366	TUB	1e-25	65	84.62
Unigene0045464	Arabidopsis_thaliana_AT1G73360.1	HB	2e-11	35	80
Unigene0045492	Vitis_vinifera_GSVIVP00007518001	AP2-EREBP	3e-16	56	80.36
Unigene0045613	Populus_trichocarpa_589283	GNAT	7e-11	14	85.71
Unigene0045875	Oryza_sativa_subsp._indica_OsIBCD007624	PLATZ	2e-20	50	80
Unigene0046017	Vitis_vinifera_GSVIVP00028942001	bHLH	4e-69	137	80.29
Unigene0046164	Sorghum_bicolor_5032070	G2-like	9e-29	56	91.07
Unigene0046165	Populus_trichocarpa_724244	G2-like	7e-26	49	87.76
Unigene0046232	Oryza_sativa_subsp._japonica_LOC_Os04g28280.1	bHLH	9e-39	80	80
Unigene0046254	Oryza_sativa_subsp._indica_OsIBCD032296	Alfin-like	########	242	80.99
Unigene0046255	Oryza_sativa_subsp._japonica_LOC_Os07g41740.1	Alfin-like	1e-24	49	83.67
Unigene0046256	Zea_mays_GRMZM2G121414_P02	Alfin-like	6e-26	50	84
Unigene0046257	Oryza_sativa_subsp._japonica_LOC_Os01g66420.1	Alfin-like	########	247	80.16
Unigene0046258	Oryza_sativa_subsp._japonica_LOC_Os07g41740.1	Alfin-like	2e-24	49	83.67
Unigene0046259	Zea_mays_GRMZM2G121414_P02	Alfin-like	4e-28	54	83.33
Unigene0046571	Zea_mays_GRMZM2G114872_P01	Trihelix	7e-20	49	85.71
Unigene0046574	Populus_trichocarpa_657649	TRAF	1e-62	110	85.45
Unigene0046577	Populus_trichocarpa_657649	TRAF	2e-64	110	85.45
Unigene0046615	Zea_mays_GRMZM2G178072_P01	PHD	3e-35	68	80.88
Unigene0046618	Zea_mays_GRMZM2G178072_P01	PHD	2e-35	68	80.88
Unigene0046804	Populus_trichocarpa_551895	G2-like	1e-39	84	83.33
Unigene0046845	Populus_trichocarpa_549314	CCAAT	2e-12	30	90
Unigene0046846	Carica_papaya_evm.TU.supercontig_125.6	CCAAT	3e-22	31	87.1
Unigene0046878	Vitis_vinifera_GSVIVP00027915001	Orphans	1e-59	107	81.31
Unigene0046932	Vitis_vinifera_GSVIVP00005671001	PHD	3e-21	52	82.69
Unigene0046934	Zea_mays_GRMZM2G024477_P02	SET	2e-51	94	81.91
Unigene0046988	Arabidopsis_lyrata_351649		6e-13	35	82.86
Unigene0047216	Carica_papaya_evm.TU.supercontig_768.1	WRKY	2e-19	42	88.1
Unigene0047218	Carica_papaya_evm.TU.supercontig_768.1	WRKY	1e-19	42	88.1
Unigene0047219	Arabidopsis_thaliana_AT3G04670.2	WRKY	2e-23	52	80.77
Unigene0047231	Populus_trichocarpa_255388	Orphans	1e-66	143	83.92
Unigene0047465	Zea_mays_GRMZM2G166990_P01	C3H	4e-14	38	81.58
Unigene0047466	Zea_mays_GRMZM2G166990_P01	C3H	7e-16	38	81.58
Unigene0047484	Arabidopsis_thaliana_AT5G23280.1	TCP	6e-33	57	94.74
Unigene0047548	Oryza_sativa_subsp._indica_OsIBCD001007	C3H	6e-46	75	93.33
Unigene0047584	Carica_papaya_evm.TU.supercontig_73.4	MYB	5e-16	36	80.56
Unigene0047631	Carica_papaya_evm.TU.supercontig_146.42	CAMTA	2e-38	82	81.71
Unigene0047822	Vitis_vinifera_GSVIVP00020888001	HMG	0	496	82.86
Unigene0047871	Carica_papaya_evm.TU.supercontig_2.350	LOB	3e-20	63	87.3
Unigene0047888	Arabidopsis_lyrata_487204	C2H2	1e-58	95	89.47
Unigene0047889	Zea_mays_GRMZM2G166527_P01	C2H2	4e-43	87	80.46
Unigene0047891	Vitis_vinifera_GSVIVP00018167001	C2H2	9e-42	74	81.08
Unigene0047895	Sorghum_bicolor_5032070	G2-like	7e-35	72	80.56
Unigene0048350	Oryza_sativa_subsp._japonica_LOC_Os04g27410.1	MYB-related	2e-26	71	94.37
Unigene0048351	Oryza_sativa_subsp._japonica_LOC_Os04g27410.1	MYB-related	2e-26	71	94.37
Unigene0048415	Oryza_sativa_subsp._indica_OsIBCD011005	bHLH	5e-18	46	80.43
Unigene0048420	Selaginella_moellendorffii_402040	G2-like	4e-25	51	94.12
Unigene0048421	Oryza_sativa_subsp._indica_OsIBCD000513	G2-like	1e-39	86	80.23
Unigene0048495	Vitis_vinifera_GSVIVP00019538001	AP2-EREBP	3e-56	87	91.95
Unigene0048538	Populus_trichocarpa_773249	bHLH	6e-30	63	84.13
Unigene0048632	Vitis_vinifera_GSVIVP00037889001	TCP	2e-43	77	92.21
Unigene0048811	Zea_mays_GRMZM2G126026_P01	Orphans	2e-25	55	87.27
Unigene0048910	Vitis_vinifera_GSVIVP00029724001	TAZ	0	466	90.13
Unigene0048911	Populus_trichocarpa_803030	TAZ	6e-15	52	92.31
Unigene0048912	Zea_mays_GRMZM2G139977_P02	TAZ	0	514	81.71
Unigene0048913	Zea_mays_GRMZM2G139977_P02	TAZ	0	514	81.71
Unigene0048935	Arabidopsis_thaliana_AT1G21340.1	C2C2-Dof	6e-23	37	94.59
Unigene0048972	Physcomitrella_patens_148564	bHLH	1e-36	80	80
Unigene0049074	Zea_mays_GRMZM2G089640_P01	ARF	5e-28	59	86.44
Unigene0049081	Sorghum_bicolor_4884458	MYB-related	1e-29	61	80.33
Unigene0049089	Selaginella_moellendorffii_72702	bHLH	3e-53	96	85.42
Unigene0049183	Oryza_sativa_subsp._japonica_LOC_Os10g41200.1	MYB-related	2e-19	37	97.3
Unigene0049186	Oryza_sativa_subsp._japonica_LOC_Os10g41200.3	MYB-related	1e-34	77	85.71
Unigene0049202	Oryza_sativa_subsp._japonica_LOC_Os04g27410.1	MYB-related	7e-46	92	83.7
Unigene0049220	Carica_papaya_evm.TU.supercontig_16.131	SNF2	0	452	90.27
Unigene0049221	Carica_papaya_evm.TU.supercontig_16.131	SNF2	0	1081	86.59
Unigene0049298	Populus_trichocarpa_422589	C2C2-Dof	4e-31	57	89.47
Unigene0049300	Arabidopsis_lyrata_484945	C2C2-Dof	3e-27	49	87.76
Unigene0049301	Populus_trichocarpa_422589	C2C2-Dof	7e-22	40	95
Unigene0049302	Carica_papaya_evm.TU.supercontig_318.1	C2C2-Dof	3e-16	38	86.84
Unigene0049303	Arabidopsis_lyrata_484945	C2C2-Dof	3e-27	49	87.76
Unigene0049305	Populus_trichocarpa_422589	C2C2-Dof	7e-22	40	95
Unigene0049306	Populus_trichocarpa_422589	C2C2-Dof	4e-31	57	89.47
Unigene0049394	Carica_papaya_evm.TU.supercontig_21.193	TUB	6e-15	33	90.91
Unigene0049493	Arabidopsis_lyrata_494572	AP2-EREBP	4e-21	66	86.36
Unigene0049537	Populus_trichocarpa_177029	NAC	7e-75	134	80.6
Unigene0049628	Populus_trichocarpa_563045	C2C2-Dof	6e-11	24	87.5
Unigene0049844	Vitis_vinifera_GSVIVP00024168001	C3H	0	389	81.23
Unigene0050067	Oryza_sativa_subsp._japonica_LOC_Os05g04210.1	MYB	1e-87	139	87.05
Unigene0050068	Sorghum_bicolor_3992568	MYB	4e-48	83	85.54
Unigene0050069	Oryza_sativa_subsp._japonica_LOC_Os03g20090.1	MYB	2e-88	134	93.28
Unigene0050070	Sorghum_bicolor_4153179	MYB	8e-82	135	82.96
Unigene0050204	Populus_trichocarpa_275579	mTERF	7e-33	65	80
Unigene0050408	Oryza_sativa_subsp._japonica_LOC_Os06g10470.1	C2H2	3e-18	44	81.82
Unigene0050537	Populus_trichocarpa_552367	MYB-related	5e-33	60	91.67
Unigene0050538	Populus_trichocarpa_552367	MYB-related	3e-40	72	88.89
Unigene0050656	Oryza_sativa_subsp._japonica_LOC_Os03g48970.4	CCAAT	2e-11	47	91.49
Unigene0050657	Oryza_sativa_subsp._japonica_LOC_Os03g48970.4	CCAAT	2e-11	47	91.49
Unigene0050694	Vitis_vinifera_GSVIVP00025930001	HB	3e-68	140	82.14
Unigene0050695	Vitis_vinifera_GSVIVP00025930001	HB	3e-68	140	82.14
Unigene0050778	Populus_trichocarpa_647744	C2C2-Dof	2e-12	32	84.38
Unigene0050911	Zea_mays_GRMZM2G148333_P02	AP2-EREBP	4e-29	65	83.08
Unigene0050915	Selaginella_moellendorffii_449238	EIL	4e-70	128	82.03
Unigene0050916	Selaginella_moellendorffii_449238	EIL	4e-70	128	82.03
Unigene0050940	Carica_papaya_evm.TU.supercontig_282.15	LOB	3e-78	138	86.96
Unigene0050941	Populus_trichocarpa_810965	LOB	1e-75	138	84.78
Unigene0050961	Oryza_sativa_subsp._indica_OsIBCD011800	Orphans	1e-18	39	89.74
Unigene0051229	Zea_mays_GRMZM2G082262_P02	CCAAT	5e-72	117	88.03
Unigene0051372	Oryza_sativa_subsp._indica_OsIBCD008764	HSF	1e-25	49	87.76
Unigene0051418	Zea_mays_GRMZM2G001699_P01	E2F-DP	4e-22	51	82.35
Unigene0051419	Zea_mays_GRMZM2G001699_P01	E2F-DP	1e-21	51	80.39
Unigene0051420	Zea_mays_GRMZM2G001699_P01	E2F-DP	3e-22	51	80.39
Unigene0051421	Zea_mays_GRMZM2G001699_P01	E2F-DP	1e-22	51	82.35
Unigene0051422	Zea_mays_GRMZM2G001699_P01	E2F-DP	5e-22	51	82.35
Unigene0051449	Populus_trichocarpa_273997	MYB	2e-65	102	88.24
Unigene0051450	Sorghum_bicolor_4002460	MYB	7e-17	38	89.47
Unigene0051472	Carica_papaya_evm.TU.supercontig_129.36	bHLH	1e-11	34	82.35
Unigene0051476	Vitis_vinifera_GSVIVP00017130001	AP2-EREBP	5e-23	68	80.88
Unigene0051477	Zea_mays_GRMZM2G174834_P04	AP2-EREBP	7e-41	90	90
Unigene0051479	Physcomitrella_patens_149320	AP2-EREBP	2e-11	31	87.1
Unigene0051874	Carica_papaya_evm.TU.supercontig_187.28	HB	########	272	91.18
Unigene0051875	Carica_papaya_evm.TU.supercontig_187.28	HB	########	272	91.18
Unigene0051949	Zea_mays_GRMZM2G136266_P02	bZIP	4e-24	60	80
Unigene0051952	Arabidopsis_lyrata_887800	bZIP	6e-39	106	80.19
Unigene0051953	Arabidopsis_lyrata_887800	bZIP	2e-39	106	80.19
Unigene0051986	Arabidopsis_thaliana_AT1G51950.1	AUX/IAA	5e-16	38	84.21
Unigene0052034	Physcomitrella_patens_18161	WRKY	2e-45	88	81.82
Unigene0052051	Oryza_sativa_subsp._japonica_LOC_Os07g31450.1	PHD	2e-18	39	89.74
Unigene0052264	Populus_trichocarpa_669610	bHLH	7e-38	80	97.5
Unigene0052265	Arabidopsis_lyrata_491651	bHLH	6e-16	40	82.5
Unigene0052267	Arabidopsis_lyrata_491651	bHLH	2e-16	40	82.5
Unigene0052316	Oryza_sativa_subsp._indica_OsIBCD033006	ARF	2e-17	40	80
Unigene0052317	Populus_trichocarpa_830919	ARF	1e-11	36	80.56
Unigene0052591	Carica_papaya_evm.TU.supercontig_151.33	AP2-EREBP	1e-26	71	87.32
Unigene0052712	Populus_trichocarpa_246964	GRAS	########	186	86.02
Unigene0053023	Physcomitrella_patens_153324	C2C2-Dof	1e-34	65	80
Unigene0053165	Zea_mays_GRMZM2G148087_P01	WRKY	5e-42	76	88.16
Unigene0053166	Carica_papaya_evm.TU.supercontig_72.14	WRKY	4e-53	91	87.91
Unigene0053189	Populus_trichocarpa_272567	bHLH	1e-56	106	83.02
Unigene0053265	Arabidopsis_thaliana_AT5G35210.1	DDT	3e-12	30	90
Unigene0053334	Populus_trichocarpa_179090	SBP	9e-11	28	85.71
Unigene0053356	Populus_trichocarpa_560233	FAR1	4e-13	17	82.35
Unigene0053415	Carica_papaya_evm.TU.supercontig_37.27	NAC	2e-47	79	87.34
Unigene0053635	Populus_trichocarpa_414287	Jumonji	1e-32	66	81.82
Unigene0053636	Oryza_sativa_subsp._indica_OsIBCD031572	Jumonji	1e-68	121	83.47
Unigene0053637	Vitis_vinifera_GSVIVP00015690001	Jumonji	7e-76	126	88.89
Unigene0053652	Selaginella_moellendorffii_6792	HB	5e-12	39	82.05
Unigene0053675	Populus_trichocarpa_669610	bHLH	2e-12	28	92.86
Unigene0053689	Arabidopsis_lyrata_883093	CCAAT	1e-34	73	82.19
Unigene0053708	Carica_papaya_evm.TU.supercontig_8.228	C3H	6e-14	37	81.08
Unigene0053843	Vitis_vinifera_GSVIVP00037676001	C2H2	5e-16	42	83.33
Unigene0053991	Zea_mays_GRMZM2G117690_P02	bHLH	4e-35	78	83.33
Unigene0054003	Zea_mays_GRMZM2G042250_P04	HB	0	410	80.24
Unigene0054005	Oryza_sativa_subsp._indica_OsIBCD030982	HB	1e-34	67	83.58
Unigene0054006	Vitis_vinifera_GSVIVP00024542001	HB	1e-73	124	92.74
Unigene0054103	Physcomitrella_patens_6992	HB	3e-31	63	87.3
Unigene0054104	Physcomitrella_patens_234989	HB	2e-31	72	80.56
Unigene0054220	Vitis_vinifera_GSVIVP00020556001	SET	########	269	84.76
Unigene0054221	Vitis_vinifera_GSVIVP00020556001	SET	0	439	82
Unigene0054302	Populus_trichocarpa_657649	TRAF	5e-59	110	80
Unigene0054322	Oryza_sativa_subsp._japonica_LOC_Os02g35150.1	C3H	########	205	80.98
Unigene0054324	Oryza_sativa_subsp._japonica_LOC_Os02g35150.1	C3H	########	205	80.98
Unigene0054505	Populus_trichocarpa_227771	Pseudo ARR-B	3e-14	43	81.4
Unigene0054521	Carica_papaya_evm.TU.supercontig_1055.1	MYB-related	3e-40	71	92.96
Unigene0054522	Carica_papaya_evm.TU.supercontig_1055.1	MYB-related	3e-40	71	92.96
Unigene0054523	Carica_papaya_evm.TU.supercontig_1055.1	MYB-related	2e-40	71	92.96
Unigene0054524	Carica_papaya_evm.TU.supercontig_1055.1	MYB-related	3e-40	71	92.96
Unigene0054525	Carica_papaya_evm.TU.supercontig_1055.1	MYB-related	4e-40	71	92.96
Unigene0054526	Populus_trichocarpa_731468	MYB-related	2e-43	91	83.52
Unigene0054528	Carica_papaya_evm.TU.supercontig_1055.1	MYB-related	2e-40	71	92.96
Unigene0054529	Carica_papaya_evm.TU.supercontig_1055.1	MYB-related	3e-40	71	92.96
Unigene0054531	Carica_papaya_evm.TU.supercontig_1055.1	MYB-related	4e-40	71	92.96
Unigene0054532	Populus_trichocarpa_731468	MYB-related	2e-43	91	83.52
Unigene0054533	Populus_trichocarpa_552367	MYB-related	1e-40	72	93.06
Unigene0054564	Vitis_vinifera_GSVIVP00030296001	G2-like	1e-24	51	86.27
Unigene0054589	Populus_trichocarpa_774432	WRKY	1e-32	62	85.48
Unigene0054601	Zea_mays_GRMZM2G085254_P03	IWS1	1e-92	192	82.81
Unigene0054750	Vitis_vinifera_GSVIVP00000450001	Trihelix	1e-13	31	90.32
Unigene0054751	Sorghum_bicolor_4784895	Trihelix	7e-28	56	80.36
Unigene0055264	Carica_papaya_evm.TU.supercontig_707.1	Jumonji	2e-37	71	81.69
Unigene0055344	Vitis_vinifera_GSVIVP00007494001	C2H2	0	317	82.02
Unigene0055416	Populus_trichocarpa_419382	TRAF	0	309	88.03
Unigene0055417	Oryza_sativa_subsp._japonica_LOC_Os05g33050.1	TRAF	0	561	80.75
Unigene0055418	Oryza_sativa_subsp._japonica_LOC_Os05g33050.1	TRAF	0	561	80.75
Unigene0055420	Oryza_sativa_subsp._japonica_LOC_Os05g33050.1	TRAF	0	561	80.75
Unigene0055430	Physcomitrella_patens_15794	WRKY	9e-44	77	92.21
Unigene0055482	Vitis_vinifera_GSVIVP00029072001	SET	2e-15	38	92.11
Unigene0055669	Vitis_vinifera_GSVIVP00023594001	TUB	8e-96	163	84.66
Unigene0055909	Populus_trichocarpa_234125	ABI3VP1	6e-32	65	84.62
Unigene0055911	Vitis_vinifera_GSVIVP00009730001	ABI3VP1	2e-50	106	81.13
Unigene0055912	Oryza_sativa_subsp._japonica_LOC_Os06g08400.2	Orphans	2e-82	176	85.23
Unigene0055913	Populus_trichocarpa_218990	Orphans	########	177	80.23
Unigene0055914	Populus_trichocarpa_218990	Orphans	########	177	80.23
Unigene0056136	Carica_papaya_evm.TU.supercontig_158.1	C2H2	1e-33	76	90.79
Unigene0056321	Populus_trichocarpa_230742	Orphans	2e-21	46	84.78
Unigene0056423	Populus_trichocarpa_279972	SOH1	7e-72	114	91.23
Unigene0056424	Populus_trichocarpa_253147	SOH1	9e-15	34	88.24
Unigene0056425	Arabidopsis_thaliana_AT5G19910.1	SOH1	7e-47	81	90.12
Unigene0056426	Carica_papaya_evm.TU.supercontig_13.207	SOH1	3e-47	80	91.25
Unigene0056427	Populus_trichocarpa_279972	SOH1	1e-45	81	91.36
Unigene0056455	Arabidopsis_lyrata_887320	C3H	3e-29	56	85.71
Unigene0056457	Arabidopsis_lyrata_887320	C3H	8e-28	54	85.19
Unigene0056569	Populus_trichocarpa_723010	SNF2	0	486	90.53
Unigene0056613	Zea_mays_GRMZM2G124421_P01	CCAAT	2e-53	91	85.71
Unigene0056639	Arabidopsis_thaliana_AT5G24470.1	Pseudo ARR-B	5e-16	44	84.09
Unigene0056998	Carica_papaya_evm.TU.supercontig_85.93	bZIP	2e-27	68	83.82
Unigene0057165	Oryza_sativa_subsp._japonica_LOC_Os05g27880.3	TRAF	1e-17	40	82.5
Unigene0057166	Oryza_sativa_subsp._japonica_LOC_Os05g27880.3	TRAF	3e-64	40	82.5
Unigene0057167	Oryza_sativa_subsp._japonica_LOC_Os05g27880.3	TRAF	1e-17	40	82.5
Unigene0057168	Oryza_sativa_subsp._japonica_LOC_Os05g27880.3	TRAF	3e-64	40	82.5
Unigene0057169	Oryza_sativa_subsp._japonica_LOC_Os05g27880.3	TRAF	1e-17	40	82.5
Unigene0057171	Oryza_sativa_subsp._japonica_LOC_Os05g27880.3	TRAF	3e-64	40	82.5
Unigene0057208	Sorghum_bicolor_4975380	HB	2e-88	191	81.15
Unigene0057255	Sorghum_bicolor_4051924	MYB	4e-73	126	80.95
Unigene0057304	Oryza_sativa_subsp._japonica_LOC_Os01g60020.1	NAC	3e-20	48	81.25
Unigene0057526	Sorghum_bicolor_4760333	C3H	8e-39	68	94.12
Unigene0057527	Selaginella_moellendorffii_409324	C3H	6e-24	53	86.79
Unigene0057552	Selaginella_moellendorffii_79275	LUG	2e-45	88	90.91
Unigene0057582	Carica_papaya_evm.TU.supercontig_192.21	Jumonji	6e-29	57	82.46
Unigene0057636	Carica_papaya_evm.TU.supercontig_81.134	MYB-related	2e-12	37	81.08
Unigene0057748	Oryza_sativa_subsp._indica_OsIBCD043968	zf-HD	8e-33	68	80.88
Unigene0058003	Vitis_vinifera_GSVIVP00024088001	C3H	5e-45	81	88.89
Unigene0058045	Populus_trichocarpa_197839	VOZ	2e-94	159	86.16
Unigene0058046	Populus_trichocarpa_586063	VOZ	7e-33	66	80.3
Unigene0058065	Zea_mays_GRMZM2G033185_P01	HB	9e-39	72	81.94
Unigene0058077	Physcomitrella_patens_8861	Orphans	2e-32	73	80.82
Unigene0058080	Physcomitrella_patens_8861	Orphans	6e-33	73	80.82
Unigene0058662	Populus_trichocarpa_593930	zf-HD	8e-27	56	82.14
Unigene0058664	Populus_trichocarpa_593930	zf-HD	8e-27	56	82.14
Unigene0058668	Populus_trichocarpa_589197	C3H	9e-23	51	82.35
Unigene0058949	Carica_papaya_evm.TU.supercontig_11.28	SNF2	0	632	88.45
Unigene0058956	Sorghum_bicolor_5003426	SNF2	1e-94	176	80.11
Unigene0058964	Oryza_sativa_subsp._japonica_LOC_Os04g55920.2	Tify	2e-12	36	86.11
Unigene0058965	Oryza_sativa_subsp._japonica_LOC_Os04g55920.2	Tify	2e-12	36	86.11
Unigene0058967	Oryza_sativa_subsp._japonica_LOC_Os04g55920.2	Tify	2e-12	36	86.11
Unigene0059005	Sorghum_bicolor_4767412	C3H	1e-55	92	89.13
Unigene0059096	Oryza_sativa_subsp._japonica_LOC_Os04g48070.2	HB	1e-29	61	88.52
Unigene0059311	Zea_mays_GRMZM2G006585_P01	PLATZ	########	214	100
Unigene0060196	Carica_papaya_evm.TU.supercontig_37.143	MYB-related	1e-32	56	87.5
Unigene0060522	Oryza_sativa_subsp._indica_OsIBCD021943	ARF	########	182	89.56
Unigene0060964	Carica_papaya_evm.TU.supercontig_1066.1	G2-like	2e-39	78	87.18
Unigene0061166	Carica_papaya_evm.TU.supercontig_26.25	ABI3VP1	1e-83	135	86.67
Unigene0061220	Vitis_vinifera_GSVIVP00016636001	NAC	6e-33	68	83.82
Unigene0061726	Vitis_vinifera_GSVIVP00025883001	MYB	2e-38	68	86.76
Unigene0062273	Oryza_sativa_subsp._indica_OsIBCD029212	MYB	2e-25	50	88
Unigene0062440	Carica_papaya_evm.TU.supercontig_49.32	HSF	1e-24	49	83.67
Unigene0062815	Vitis_vinifera_GSVIVP00004319001	Orphans	5e-20	91	80.22
Unigene0063282	Sorghum_bicolor_5008813	MYB	3e-63	103	88.35
Unigene0063390	Oryza_sativa_subsp._indica_OsIBCD001007	C3H	1e-47	89	80.9
Unigene0063748	Populus_trichocarpa_752763	GRAS	9e-83	141	80.14
Unigene0064417	Vitis_vinifera_GSVIVP00029867001	WRKY	1e-31	73	90.41
Unigene0064486	Zea_mays_GRMZM2G015579_P01	C2H2	6e-18	37	86.49
Unigene0064538	Zea_mays_GRMZM2G012717_P01	C2C2-CO-like	4e-26	53	88.68
Unigene0064699	Zea_mays_GRMZM2G067463_P01	AP2-EREBP	4e-11	25	88
Unigene0065063	Populus_trichocarpa_548499	HSF	2e-22	46	86.96
Unigene0065801	Oryza_sativa_subsp._indica_OsIBCD041649	AP2-EREBP	3e-42	72	88.89
Unigene0066002	Arabidopsis_lyrata_885551	NAC	9e-13	34	82.35
Unigene0066344	Populus_trichocarpa_217476	MYB	4e-21	38	97.37
Unigene0066364	Populus_trichocarpa_408761	MYB	9e-57	86	96.51
Unigene0066684	Populus_trichocarpa_646464	C2C2-YABBY	4e-43	80	81.25
Unigene0066818	Carica_papaya_evm.TU.supercontig_538.1	bZIP	3e-44	85	84.71
Unigene0067086	Zea_mays_GRMZM2G062244_P01	HB	6e-20	47	82.98
Unigene0067216	Oryza_sativa_subsp._japonica_LOC_Os04g08060.1	C2H2	9e-11	28	85.71
Unigene0067864	Vitis_vinifera_GSVIVP00020265001	MYB	1e-28	57	85.96
Unigene0068203	Vitis_vinifera_GSVIVP00026383001	C2C2-YABBY	2e-29	59	88.14
Unigene0068765	Oryza_sativa_subsp._japonica_LOC_Os04g22990.1	FAR1	3e-20	21	85.71
Unigene0069397	Zea_mays_GRMZM2G149347_P01	C3H	7e-19	40	80
Unigene0070096	Vitis_vinifera_GSVIVP00036223001	NAC	5e-21	43	86.05
Unigene0071509	Vitis_vinifera_GSVIVP00014834001	bHLH	3e-27	55	89.09
Unigene0071603	Oryza_sativa_subsp._japonica_LOC_Os05g51830.1	C2H2	8e-22	48	83.33
Unigene0071708	Oryza_sativa_subsp._japonica_LOC_Os01g08320.1	AUX/IAA	3e-35	72	81.94
Unigene0071721	Sorghum_bicolor_129607	TCP	5e-27	62	82.26
Unigene0071814	Carica_papaya_evm.TU.supercontig_14.31	WRKY	2e-36	66	87.88
Unigene0071853	Vitis_vinifera_GSVIVP00024996001	BES1	9e-16	32	93.75
Unigene0071910	Oryza_sativa_subsp._indica_OsIBCD000527	AUX/IAA	1e-13	38	81.58
Unigene0071913	Populus_trichocarpa_414492	AP2-EREBP	4e-17	53	83.02
Unigene0071926	Carica_papaya_evm.TU.supercontig_52.108	TRAF	0	340	90
Unigene0071958	Vitis_vinifera_GSVIVP00033165001	WRKY	7e-38	44	86.36
Unigene0071973	Populus_trichocarpa_423222	CCAAT	2e-64	117	92.31
Unigene0071978	Vitis_vinifera_GSVIVP00011492001	MADS	2e-63	112	86.61
Unigene0072011	Carica_papaya_evm.TU.supercontig_1815.2	TCP	5e-11	43	88.37
Unigene0072023	Zea_mays_GRMZM2G159431_P01	HB	########	269	85.5
Unigene0072051	Selaginella_moellendorffii_72702	bHLH	4e-56	93	91.4
Unigene0072084	Arabidopsis_lyrata_885785	MYB	5e-76	142	83.1
Unigene0072129	Oryza_sativa_subsp._indica_OsIBCD016328	EIL	2e-19	49	81.63
Unigene0072131	Carica_papaya_evm.TU.supercontig_2267.1	C3H	1e-28	60	81.67
Unigene0072281	Vitis_vinifera_GSVIVP00016585001	MYB-related	2e-23	54	81.48
Unigene0072283	Arabidopsis_lyrata_885785	MYB	3e-87	154	83.12
Unigene0072349	Vitis_vinifera_GSVIVP00031190001	bHLH	1e-22	74	82.43
Unigene0072379	Oryza_sativa_subsp._indica_OsIBCD004527	bHLH	3e-21	50	82
Unigene0072474	Oryza_sativa_subsp._japonica_LOC_Os01g69980.1	TCP	1e-39	84	86.9
Unigene0072574	Populus_trichocarpa_657649	TRAF	2e-63	109	86.24
Unigene0072602	Sorghum_bicolor_5048453	G2-like	3e-57	103	83.5
Unigene0072822	Populus_trichocarpa_279972	SOH1	2e-46	80	91.25
Unigene0072823	Carica_papaya_evm.TU.supercontig_13.207	SOH1	8e-72	120	85.83
Unigene0072827	Populus_trichocarpa_279972	SOH1	1e-45	81	91.36
Unigene0072995	Vitis_vinifera_GSVIVP00014267001	AP2-EREBP	8e-18	58	84.48
Unigene0072996	Vitis_vinifera_GSVIVP00014267001	AP2-EREBP	8e-13	49	83.67
Unigene0072997	Vitis_vinifera_GSVIVP00014267001	AP2-EREBP	9e-13	49	83.67
Unigene0072998	Vitis_vinifera_GSVIVP00014267001	AP2-EREBP	8e-13	49	83.67
Unigene0073005	Arabidopsis_lyrata_900392	G2-like	1e-27	65	81.54
Unigene0073119	Carica_papaya_evm.TU.supercontig_21.193	TUB	4e-56	116	80.17
Unigene0073120	Populus_trichocarpa_801331	TUB	2e-73	148	81.76
Unigene0073146	Physcomitrella_patens_138651	C2C2-Dof	3e-33	60	85
Unigene0073147	Physcomitrella_patens_138651	C2C2-Dof	3e-33	60	85
Unigene0073161	Oryza_sativa_subsp._indica_OsIBCD018348	WRKY	8e-18	40	90
Unigene0073200	Oryza_sativa_subsp._japonica_LOC_Os04g55560.3	AP2-EREBP	5e-66	127	80.31
Unigene0073215	Vitis_vinifera_GSVIVP00005994001	ARID	########	295	84.41
Unigene0073216	Vitis_vinifera_GSVIVP00005994001	ARID	########	299	84.28
Unigene0073310	Oryza_sativa_subsp._japonica_LOC_Os09g39810.1	AP2-EREBP	6e-22	60	80
Unigene0073314	Populus_trichocarpa_255388	Orphans	4e-66	143	83.92
Unigene0073332	Vitis_vinifera_GSVIVP00031646001	bHLH	4e-46	95	80
Unigene0073393	Selaginella_moellendorffii_443461	AP2-EREBP	########	232	82.76
Unigene0073628	Oryza_sativa_subsp._japonica_LOC_Os09g38610.1	C2H2	3e-12	33	81.82
Unigene0073638	Zea_mays_GRMZM2G173786_P01	MADS	9e-84	147	95.92
Unigene0073739	Carica_papaya_evm.TU.supercontig_4.108	bHLH	2e-44	83	89.16
Unigene0073772	Carica_papaya_evm.TU.supercontig_19.123	AP2-EREBP	2e-33	107	80.37
Unigene0073802	Zea_mays_GRMZM2G038066_P01	Alfin-like	1e-76	133	80.45
Unigene0073828	Arabidopsis_lyrata_328625	WRKY	1e-50	129	85.27
Unigene0073863	Carica_papaya_evm.TU.supercontig_48.130	C2C2-GATA	6e-14	40	80
Unigene0073909	Zea_mays_GRMZM2G125717_P06	ARF	########	294	80.61
Unigene0073925	Vitis_vinifera_GSVIVP00028351001	ARF	0	473	83.51
Unigene0073994	Oryza_sativa_subsp._indica_OsIBCD029183	HB	4e-14	42	80.95
Unigene0074234	Physcomitrella_patens_34992	bHLH	2e-32	71	80.28
Unigene0074246	Vitis_vinifera_GSVIVP00016564001	C2C2-GATA	2e-14	31	93.55
Unigene0074373	Zea_mays_GRMZM2G013158_P01	AUX/IAA	9e-12	31	87.1
Unigene0074406	Carica_papaya_evm.TU.supercontig_594.1	NAC	2e-35	77	81.82
Unigene0074442	Oryza_sativa_subsp._indica_OsIBCD001007	C3H	########	204	91.67
Unigene0074510	Arabidopsis_thaliana_AT1G25440.1	C2C2-CO-like	4e-16	39	100
Unigene0074511	Oryza_sativa_subsp._japonica_LOC_Os02g35150.1	C3H	3e-74	131	81.68
Unigene0074541	Vitis_vinifera_GSVIVP00029335001	G2-like	3e-16	42	80.95
Unigene0074550	Zea_mays_GRMZM2G054844_P01	C3H	6e-36	65	87.69
Unigene0074570	Carica_papaya_evm.TU.supercontig_6.215	Orphans	9e-63	102	92.16
Unigene0074589	Zea_mays_GRMZM2G096439_P01	CCAAT	2e-56	117	93.16
Unigene0074593	Sorghum_bicolor_5048453	G2-like	8e-57	103	83.5
Unigene0074599	Oryza_sativa_subsp._indica_OsIBCD001007	C3H	0	399	83.71
Unigene0074653	Carica_papaya_evm.TU.supercontig_184.31	WRKY	4e-26	54	87.04
Unigene0074676	Vitis_vinifera_GSVIVP00034328001	HB	0	834	80.22
Unigene0074720	Arabidopsis_lyrata_871950	SNF2	0	487	81.11
Unigene0074740	Oryza_sativa_subsp._indica_OsIBCD007344	AP2-EREBP	3e-14	36	94.44
Unigene0074789	Oryza_sativa_subsp._japonica_LOC_Os09g38440.1	PHD	1e-25	61	83.61
Unigene0074811	Vitis_vinifera_GSVIVP00015398001	TRAF	3e-57	103	84.47
Unigene0074813	Vitis_vinifera_GSVIVP00027824001	MBF1	2e-72	142	86.62
Unigene0074893	Oryza_sativa_subsp._japonica_LOC_Os04g43680.1	MYB	2e-76	116	90.52
Unigene0074909	Vitis_vinifera_GSVIVP00022262001	SRS	2e-30	58	82.76
Unigene0074940	Carica_papaya_evm.TU.supercontig_3.55	Sigma70-like	8e-65	156	80.13
Unigene0074945	Zea_mays_GRMZM2G046021_P01	GNAT	########	174	89.66
Unigene0074968	Populus_trichocarpa_734437	GRAS	########	242	85.95
Unigene0074988	Oryza_sativa_subsp._indica_OsIBCD026632	NAC	2e-28	58	81.03
Unigene0075015	Carica_papaya_evm.TU.supercontig_19.123	AP2-EREBP	2e-33	107	80.37
Unigene0075029	Zea_mays_GRMZM2G018266_P02	AP2-EREBP	2e-36	84	89.29
Unigene0075070	Vitis_vinifera_GSVIVP00021473001	MYB	4e-33	37	81.08
Unigene0075961	Oryza_sativa_subsp._indica_OsIBCD014855	C2C2-CO-like	3e-20	47	87.23
Unigene0075962	Oryza_sativa_subsp._indica_OsIBCD014855	C2C2-CO-like	3e-20	47	87.23
Unigene0076046	Arabidopsis_thaliana_AT5G19910.1	SOH1	5e-47	81	90.12
Unigene0076047	Arabidopsis_thaliana_AT5G19910.1	SOH1	1e-46	81	90.12
Unigene0076097	Zea_mays_GRMZM2G091964_P03	CCAAT	1e-31	66	84.85
Unigene0076179	Populus_trichocarpa_818659	GNAT	########	175	91.43
Unigene0076199	Carica_papaya_evm.TU.supercontig_8.228	C3H	1e-14	37	81.08
Unigene0076216	Populus_trichocarpa_242678	FHA	1e-77	134	82.84
Unigene0076234	Carica_papaya_evm.TU.supercontig_15.1	ABI3VP1	########	254	80.31
Unigene0076349	Populus_trichocarpa_569483	Orphans	1e-32	62	91.94
Unigene0076402	Oryza_sativa_subsp._japonica_LOC_Os09g38610.1	C2H2	2e-15	36	88.89
Unigene0076424	Vitis_vinifera_GSVIVP00024996001	BES1	2e-28	76	81.58
Unigene0076476	Carica_papaya_evm.TU.supercontig_132.35	AP2-EREBP	2e-15	36	94.44
Unigene0076492	Oryza_sativa_subsp._japonica_LOC_Os10g14040.1	FAR1	6e-18	43	88.37
Unigene0076536	Oryza_sativa_subsp._japonica_LOC_Os04g27410.1	MYB-related	8e-28	73	94.52
Unigene0076549	Zea_mays_GRMZM2G134372_P02	HB	8e-44	88	80.68
Unigene0076559	Arabidopsis_thaliana_AT3G53790.1	MYB-related	4e-43	89	82.02
Unigene0076640	Selaginella_moellendorffii_6792	HB	1e-12	39	82.05
Unigene0076684	Populus_trichocarpa_240180	bHLH	4e-33	59	94.92
Unigene0076798	Vitis_vinifera_GSVIVP00015416001	NAC	2e-95	159	86.16
Unigene0076824	Physcomitrella_patens_87648	MYB-related	1e-42	95	90.53
Unigene0076855	Carica_papaya_evm.TU.supercontig_127.24	WRKY	4e-32	59	88.14
Unigene0076862	Vitis_vinifera_GSVIVP00027287001	WRKY	4e-57	142	84.51
Unigene0076874	Oryza_sativa_subsp._indica_OsIBCD029183	HB	3e-14	42	80.95
Unigene0076940	Zea_mays_GRMZM2G151309_P01	C2H2	1e-22	49	87.76
Unigene0077086	Oryza_sativa_subsp._japonica_LOC_Os03g58160.2	HSF	9e-19	45	84.44
Unigene0077183	Populus_trichocarpa_831441	LOB	1e-62	110	86.36
Unigene0077203	Arabidopsis_thaliana_AT4G31550.1	WRKY	1e-17	41	85.37
Unigene0077329	Oryza_sativa_subsp._indica_OsIBCD010133	Jumonji	4e-34	69	81.16
Unigene0077339	Arabidopsis_lyrata_491902	G2-like	5e-34	19	84.21
Unigene0077397	Vitis_vinifera_GSVIVP00028835001	PHD	2e-15	40	80
Unigene0077436	Carica_papaya_evm.TU.supercontig_70.66	GNAT	########	180	86.11
Unigene0077475	Selaginella_moellendorffii_31177	PHD	1e-13	8	87.5
Unigene0077579	Arabidopsis_lyrata_863107	C2C2-GATA	1e-11	31	83.87
Unigene0077602	Sorghum_bicolor_5030761	AP2-EREBP	4e-20	42	92.86
Unigene0077619	Vitis_vinifera_GSVIVP00011041001	HB	7e-46	92	85.87
Unigene0077624	Populus_trichocarpa_573000	PHD	########	187	88.77
Unigene0077635	Selaginella_moellendorffii_233860	C2H2	2e-47	86	88.37
Unigene0077642	Zea_mays_GRMZM2G160508_P01	C2H2	3e-49	78	94.87
Unigene0077662	Micromonas_pusilla_CCMP1545_31771	MYB	2e-23	49	95.92
Unigene0077780	Arabidopsis_thaliana_AT5G35210.1	DDT	4e-49	108	84.26
Unigene0077788	Vitis_vinifera_GSVIVP00017314001	CCAAT	3e-61	106	85.85
Unigene0077821	Physcomitrella_patens_114826	EIL	########	220	82.27
Unigene0077973	Sorghum_bicolor_5061966	C3H	2e-35	72	84.72
Unigene0078045	Oryza_sativa_subsp._indica_OsIBCD030168	NAC	2e-77	158	81.01
Unigene0078066	Arabidopsis_lyrata_890619	WRKY	1e-19	44	81.82
Unigene0078115	Zea_mays_GRMZM2G143066_P03	HB	6e-27	59	88.14
Unigene0079012	Arabidopsis_thaliana_AT5G66320.2	C2C2-GATA	2e-36	72	86.11
Unigene0079016	Carica_papaya_evm.TU.supercontig_26.22	C3H	0	743	84.79
Unigene0079120	Zea_mays_GRMZM2G085964_P02	AP2-EREBP	1e-18	59	89.83
Unigene0079123	Sorghum_bicolor_4152567	AP2-EREBP	3e-19	58	81.03
Unigene0079282	Zea_mays_GRMZM2G126026_P01	Orphans	5e-25	55	87.27
Unigene0079427	Populus_trichocarpa_826159	TRAF	2e-71	130	83.85
Unigene0079433	Vitis_vinifera_GSVIVP00025398001	HB	5e-66	128	82.03
Unigene0079452	Arabidopsis_lyrata_470975	CCAAT	1e-58	109	80.73
Unigene0079496	Populus_trichocarpa_227771	Pseudo ARR-B	3e-14	43	81.4
Unigene0079505	Populus_trichocarpa_206955	SET	5e-37	70	88.57
Unigene0079527	Vitis_vinifera_GSVIVP00022742001	Orphans	9e-26	56	87.5
Unigene0079599	Sorghum_bicolor_5051285	AP2-EREBP	5e-19	57	89.47
Unigene0079621	Vitis_vinifera_GSVIVP00028119001	WRKY	4e-47	86	84.88
Unigene0079638	Oryza_sativa_subsp._indica_OsIBCD028465	G2-like	3e-15	37	100
Unigene0079722	Arabidopsis_lyrata_493633	Orphans	1e-16	43	83.72
Unigene0079749	Vitis_vinifera_GSVIVP00015416001	NAC	2e-94	159	85.53
Unigene0079777	Populus_trichocarpa_822568	C2C2-GATA	1e-21	48	87.5
Unigene0079801	Carica_papaya_evm.TU.supercontig_3.149	GRF	4e-12	32	87.5
Unigene0079827	Oryza_sativa_subsp._japonica_LOC_Os07g41740.1	Alfin-like	1e-66	139	81.29
Unigene0079857	Vitis_vinifera_GSVIVP00023866001	AP2-EREBP	5e-22	60	93.33
Unigene0079873	Populus_trichocarpa_179090	SBP	3e-28	61	81.97
Unigene0079940	Oryza_sativa_subsp._japonica_LOC_Os07g41740.1	Alfin-like	7e-67	139	81.29
Unigene0080029	Arabidopsis_thaliana_AT4G13040.2	AP2-EREBP	1e-29	57	85.96
Unigene0080180	Arabidopsis_lyrata_907192	SNF2	2e-49	101	90.1
Unigene0080289	Vitis_vinifera_GSVIVP00011041001	HB	5e-20	63	80.95
Unigene0080338	Vitis_vinifera_GSVIVP00022262001	SRS	4e-35	64	82.81
Unigene0080349	Populus_trichocarpa_177109	Trihelix	1e-33	83	86.75
Unigene0080387	Carica_papaya_evm.TU.supercontig_59.8	AUX/IAA	1e-29	57	84.21
Unigene0080468	Arabidopsis_thaliana_AT1G07540.1	MYB-related	3e-43	79	92.41
Unigene0080500	Selaginella_moellendorffii_39612	PLATZ	2e-22	51	84.31
Unigene0080501	Populus_trichocarpa_549314	CCAAT	1e-38	75	84
Unigene0080503	Arabidopsis_thaliana_AT1G25440.1	C2C2-CO-like	4e-16	39	100
Unigene0080542	Arabidopsis_thaliana_AT5G66320.2	C2C2-GATA	2e-36	72	86.11
Unigene0080662	Carica_papaya_evm.TU.supercontig_17.47	ARF	########	269	91.45
Unigene0080744	Populus_trichocarpa_754644	C2H2	0	397	92.44
Unigene0080748	Vitis_vinifera_GSVIVP00007494001	C2H2	4e-45	92	84.78
Unigene0080809	Oryza_sativa_subsp._japonica_LOC_Os02g32570.2	SNF2	1e-15	44	86.36
Unigene0080891	Sorghum_bicolor_4123377	MYB	8e-56	89	94.38
Unigene0080926	Vitis_vinifera_GSVIVP00032197001	C2H2	8e-61	112	84.82
Unigene0080928	Arabidopsis_lyrata_885785	MYB	4e-87	154	83.12
Unigene0081037	Arabidopsis_thaliana_AT5G66320.2	C2C2-GATA	3e-36	72	83.33
Unigene0081060	Populus_trichocarpa_281841	AP2-EREBP	5e-65	134	91.04
Unigene0081974	Populus_trichocarpa_279972	SOH1	2e-72	114	91.23
Unigene0082007	Oryza_sativa_subsp._japonica_LOC_Os04g46250.1	AP2-EREBP	4e-35	69	88.41
Unigene0082016	Populus_trichocarpa_171756	C2C2-GATA	4e-37	71	85.92
Unigene0082017	Populus_trichocarpa_171756	C2C2-GATA	5e-37	70	88.57
Unigene0082112	Carica_papaya_evm.TU.supercontig_26.22	C3H	4e-86	139	93.53
Unigene0082157	Arabidopsis_lyrata_902907	MYB	1e-75	142	83.1
Unigene0082158	Arabidopsis_lyrata_902907	MYB	2e-75	142	83.1
Unigene0082176	Vitis_vinifera_GSVIVP00031984001	ABI3VP1	########	211	80.57
Unigene0082225	Selaginella_moellendorffii_99404	bZIP	5e-16	40	87.5
Unigene0082255	Sorghum_bicolor_4144418	AP2-EREBP	5e-16	61	80.33
Unigene0082302	Vitis_vinifera_GSVIVP00018606001	SNF2	0	626	80.35
Unigene0082357	Populus_trichocarpa_240180	bHLH	4e-26	52	90.38
Unigene0082414	Sorghum_bicolor_5032070	G2-like	1e-28	56	91.07
Unigene0082436	Populus_trichocarpa_246937	TRAF	3e-73	134	84.33
Unigene0082449	Oryza_sativa_subsp._japonica_LOC_Os10g14040.1	FAR1	7e-18	43	88.37
Unigene0082464	Zea_mays_GRMZM2G033245_P01	CCAAT	2e-18	43	83.72
Unigene0082503	Populus_trichocarpa_574261	MYB	3e-81	131	87.79
Unigene0082507	Oryza_sativa_subsp._indica_OsIBCD007566	MYB-related	1e-48	92	80.43
Unigene0082536	Zea_mays_GRMZM2G153233_P01	ARF	2e-36	79	81.01
Unigene0082562	Sorghum_bicolor_143107	SNF2	0	346	89.6
Unigene0082567	Zea_mays_GRMZM2G145178_P01	TCP	7e-39	74	87.84
Unigene0082711	Vitis_vinifera_GSVIVP00002951001	C3H	########	185	96.22
Unigene0082835	Carica_papaya_evm.TU.supercontig_73.13	MYB	1e-77	130	84.62
Unigene0082888	Oryza_sativa_subsp._japonica_LOC_Os09g12750.1	G2-like	2e-42	79	94.94
Unigene0083073	Populus_trichocarpa_202615	SRS	1e-25	47	91.49
Unigene0083081	Oryza_sativa_subsp._indica_OsIBCD001968	LOB	2e-81	143	84.62
Unigene0083317	Populus_trichocarpa_828115	G2-like	1e-32	68	83.82
Unigene0083433	Zea_mays_GRMZM2G159431_P01	HB	########	269	85.5
Unigene0083435	Carica_papaya_evm.TU.supercontig_55.102	WRKY	6e-51	99	81.82
Unigene0083443	Sorghum_bicolor_4988264	G2-like	2e-19	55	80
Unigene0083449	Sorghum_bicolor_4770553	C3H	1e-26	55	83.64
Unigene0083453	Carica_papaya_evm.TU.supercontig_83.96	DDT	1e-26	60	81.67
Unigene0083461	Carica_papaya_evm.TU.supercontig_34.32	CCAAT	1e-92	168	80.95
Unigene0083472	Populus_trichocarpa_549314	CCAAT	1e-38	75	84
Unigene0083483	Carica_papaya_evm.TU.supercontig_213.9	Orphans	6e-77	135	83.7
Unigene0083505	Vitis_vinifera_GSVIVP00011492001	MADS	2e-63	112	86.61
Unigene0083517	Oryza_sativa_subsp._japonica_LOC_Os02g32570.2	SNF2	2e-94	171	83.04
Unigene0083550	Populus_trichocarpa_549314	CCAAT	9e-39	75	84
Unigene0083562	Carica_papaya_evm.TU.supercontig_17.47	ARF	########	268	91.79
Unigene0083572	Carica_papaya_evm.TU.supercontig_184.31	WRKY	3e-26	54	87.04
Unigene0083575	Vitis_vinifera_GSVIVP00029335001	G2-like	1e-16	42	80.95
Unigene0083582	Populus_trichocarpa_669610	bHLH	6e-22	59	100
Unigene0083592	Carica_papaya_evm.TU.supercontig_14.189	TCP	1e-13	36	88.89
Unigene0083621	Carica_papaya_evm.TU.supercontig_173.19	ABI3VP1	4e-81	176	80.11
Unigene0083662	Physcomitrella_patens_19922	AP2-EREBP	1e-17	42	83.33
Unigene0083667	Carica_papaya_evm.TU.supercontig_213.9	Orphans	2e-77	135	83.7
Unigene0083668	Physcomitrella_patens_88203	G2-like	1e-31	74	82.43
Unigene0083707	Arabidopsis_thaliana_AT2G46790.2	Orphans	2e-17	41	80.49
Unigene0083767	Zea_mays_AC194362.3_FGP021	ABI3VP1	1e-15	33	96.97
Unigene0083778	Oryza_sativa_subsp._indica_OsIBCD035649	HB	0	341	85.04
Unigene0083816	Populus_trichocarpa_641182	MYB-related	1e-33	63	90.48
Unigene0083832	Oryza_sativa_subsp._indica_OsIBCD001968	LOB	2e-57	107	85.05
Unigene0083870	Carica_papaya_evm.TU.supercontig_184.31	WRKY	1e-27	54	87.04
Unigene0083892	Populus_trichocarpa_232856	NAC	9e-20	49	81.63
Unigene0083908	Sorghum_bicolor_5048453	G2-like	7e-57	103	83.5
Unigene0083965	Vitis_vinifera_GSVIVP00032197001	C2H2	2e-60	112	84.82
Unigene0083984	Sorghum_bicolor_5048453	G2-like	4e-57	103	83.5
Unigene0083985	Oryza_sativa_subsp._japonica_LOC_Os12g41900.1	SET	7e-16	40	87.5
Unigene0084013	Oryza_sativa_subsp._indica_OsIBCD001007	C3H	9e-64	125	80.8
Unigene0084778	Zea_mays_GRMZM2G174686_P01	MADS	5e-40	84	80.95
Unigene0084781	Zea_mays_GRMZM2G174686_P01	MADS	4e-40	84	80.95
Unigene0084796	Physcomitrella_patens_142112	AP2-EREBP	7e-21	59	93.22
Unigene0084797	Zea_mays_GRMZM2G082262_P02	CCAAT	5e-69	121	86.78
Unigene0084798	Zea_mays_GRMZM2G082262_P02	CCAAT	5e-71	117	88.03
Unigene0084799	Zea_mays_GRMZM2G082262_P02	CCAAT	3e-69	121	86.78
Unigene0084821	Zea_mays_GRMZM2G137866_P03	SET	0	355	82.54
Unigene0084822	Zea_mays_GRMZM2G137866_P03	SET	0	364	82.69
Unigene0084823	Zea_mays_GRMZM2G137866_P03	SET	0	355	82.54
Unigene0084824	Zea_mays_GRMZM2G137866_P03	SET	0	355	82.54
Unigene0084825	Zea_mays_GRMZM2G137866_P03	SET	0	364	82.69
Unigene0084826	Zea_mays_GRMZM2G137866_P03	SET	0	355	82.54
Unigene0084827	Zea_mays_GRMZM2G137866_P03	SET	0	364	82.69
Unigene0084828	Zea_mays_GRMZM2G137866_P03	SET	0	364	82.69
Unigene0084884	Oryza_sativa_subsp._indica_OsIBCD001007	C3H	4e-70	140	82.14
Unigene0084885	Oryza_sativa_subsp._indica_OsIBCD001007	C3H	2e-70	140	82.14
Unigene0084886	Oryza_sativa_subsp._indica_OsIBCD001007	C3H	########	193	84.97
Unigene0085117	Zea_mays_GRMZM2G148333_P02	AP2-EREBP	3e-29	65	83.08
Unigene0085118	Zea_mays_GRMZM2G148333_P02	AP2-EREBP	3e-29	65	83.08
Unigene0085135	Oryza_sativa_subsp._indica_OsIBCD018348	WRKY	7e-18	40	90
Unigene0085206	Oryza_sativa_subsp._indica_OsIBCD001039	C3H	9e-51	88	96.59
Unigene0085346	Sorghum_bicolor_5047840	AP2-EREBP	8e-92	170	84.12
Unigene0085382	Vitis_vinifera_GSVIVP00025449001	MED7	7e-64	144	88.89
Unigene0085419	Oryza_sativa_subsp._indica_OsIBCD012510	C2C2-GATA	1e-16	39	87.18
Unigene0085649	Populus_trichocarpa_569394	C2H2	########	240	80.42
Unigene0085656	Vitis_vinifera_GSVIVP00019192001	bHLH	4e-18	42	85.71
Unigene0085720	Vitis_vinifera_GSVIVP00026902001	WRKY	6e-49	80	88.75
Unigene0085823	Sorghum_bicolor_5044404	zf-HD	8e-26	57	82.46
Unigene0085957	Zea_mays_GRMZM2G129288_P03	TUB	3e-14	33	87.88
Unigene0086005	Sorghum_bicolor_4805423	MYB	1e-87	129	92.25
Unigene0086115	Populus_trichocarpa_272608	bZIP	1e-23	56	83.93
Unigene0086149	Populus_trichocarpa_412097	MYB	4e-15	33	93.94
Unigene0086398	Carica_papaya_evm.TU.supercontig_254.4	HB	7e-43	92	85.87
Unigene0086421	Carica_papaya_evm.TU.supercontig_37.117	Trihelix	5e-21	51	80.39
Unigene0086424	Oryza_sativa_subsp._indica_OsIBCD012106	MYB-related	5e-28	54	92.59
Unigene0086437	Physcomitrella_patens_19922	AP2-EREBP	2e-18	42	83.33
Unigene0086456	Sorghum_bicolor_4805882	bHLH	2e-42	80	81.25
Unigene0086528	Sorghum_bicolor_5030761	AP2-EREBP	5e-20	42	92.86
Unigene0086580	Vitis_vinifera_GSVIVP00023246001	E2F-DP	########	186	80.11
Unigene0086584	Populus_trichocarpa_664330	WRKY	6e-45	82	89.02
Unigene0086585	Oryza_sativa_subsp._japonica_LOC_Os02g35150.1	C3H	3e-74	131	81.68
Unigene0086611	Zea_mays_GRMZM2G130442_P02	HB	########	310	80.32
Unigene0086633	Populus_trichocarpa_555506	ABI3VP1	3e-12	40	80
Unigene0086645	Carica_papaya_evm.TU.supercontig_2267.1	C3H	1e-28	60	81.67
Unigene0086750	Carica_papaya_evm.TU.supercontig_90.53	C3H	8e-15	35	88.57
Unigene0086752	Populus_trichocarpa_261219	SET	1e-49	87	93.1
Unigene0086777	Populus_trichocarpa_768403	HB	8e-11	30	86.67
Unigene0086832	Oryza_sativa_subsp._japonica_LOC_Os02g32570.2	SNF2	1e-15	44	86.36
Unigene0086840	Arabidopsis_lyrata_474760	CCAAT	4e-60	105	85.71
Unigene0086917	Zea_mays_GRMZM2G136266_P02	bZIP	2e-23	60	80
Unigene0087101	Populus_trichocarpa_657649	TRAF	5e-65	110	86.36
Unigene0087118	Carica_papaya_evm.TU.supercontig_73.13	MYB	1e-75	119	86.55
Unigene0087761	Populus_trichocarpa_410027	bHLH	5e-16	39	87.18
Unigene0087762	Oryza_sativa_subsp._japonica_LOC_Os10g23050.1	bHLH	1e-24	54	87.04
Unigene0087763	Carica_papaya_evm.TU.supercontig_55.62	bHLH	1e-24	54	88.89
Unigene0087764	Oryza_sativa_subsp._japonica_LOC_Os10g23050.1	bHLH	1e-24	54	87.04
Unigene0087765	Carica_papaya_evm.TU.supercontig_48.15	bHLH	6e-25	54	87.04
Unigene0087766	Populus_trichocarpa_410027	bHLH	7e-16	39	87.18
Unigene0087767	Vitis_vinifera_GSVIVP00022870001	bHLH	3e-14	39	84.62
Unigene0087768	Populus_trichocarpa_410027	bHLH	9e-16	39	87.18
Unigene0087903	Zea_mays_GRMZM2G033185_P01	HB	6e-39	72	87.5
Unigene0087941	Vitis_vinifera_GSVIVP00014267001	AP2-EREBP	8e-13	49	83.67
Unigene0087942	Vitis_vinifera_GSVIVP00014267001	AP2-EREBP	9e-13	49	83.67
Unigene0087943	Vitis_vinifera_GSVIVP00014267001	AP2-EREBP	8e-13	49	83.67
Unigene0087944	Vitis_vinifera_GSVIVP00014267001	AP2-EREBP	9e-13	49	83.67
Unigene0087978	Zea_mays_GRMZM2G178072_P01	PHD	2e-35	68	80.88
Unigene0088033	Selaginella_moellendorffii_72702	bHLH	1e-37	71	87.32
Unigene0088034	Selaginella_moellendorffii_72702	bHLH	1e-37	71	87.32
Unigene0088132	Oryza_sativa_subsp._japonica_LOC_Os04g55920.2	Tify	2e-12	36	86.11
Unigene0088141	Oryza_sativa_subsp._japonica_LOC_Os04g55560.3	AP2-EREBP	2e-66	127	80.31
Unigene0088195	Vitis_vinifera_GSVIVP00011492001	MADS	5e-71	112	91.07
Unigene0088196	Vitis_vinifera_GSVIVP00011492001	MADS	2e-38	64	96.88
Unigene0088226	Oryza_sativa_subsp._japonica_LOC_Os04g55560.3	AP2-EREBP	1e-66	127	80.31
Unigene0088345	Arabidopsis_thaliana_AT4G11660.1	HSF	5e-55	101	81.19
Unigene0088346	Populus_trichocarpa_548499	HSF	1e-61	65	90.77
Unigene0088475	Vitis_vinifera_GSVIVP00036589001	AP2-EREBP	2e-20	63	85.71
Unigene0088477	Oryza_sativa_subsp._indica_OsIBCD010133	Jumonji	3e-24	52	84.62
Unigene0088497	Carica_papaya_evm.TU.supercontig_5.100	Trihelix	2e-51	92	91.3
Unigene0088516	Oryza_sativa_subsp._japonica_LOC_Os10g14040.1	FAR1	2e-18	46	86.96
Unigene0088594	Oryza_sativa_subsp._indica_OsIBCD028528	SET	2e-55	135	80
Unigene0088731	Populus_trichocarpa_423258	LOB	5e-72	120	87.5
Unigene0088808	Physcomitrella_patens_87648	MYB-related	1e-43	99	88.89
Unigene0088817	Carica_papaya_evm.TU.supercontig_73.13	MYB	2e-77	130	84.62
Unigene0088958	Oryza_sativa_subsp._japonica_LOC_Os12g41900.1	SET	2e-15	40	87.5
Unigene0088977	Oryza_sativa_subsp._indica_OsIBCD014855	C2C2-CO-like	3e-17	46	84.78
Unigene0089040	Arabidopsis_thaliana_AT5G53200.1	MYB-related	2e-32	66	81.82
Unigene0089219	Oryza_sativa_subsp._indica_OsIBCD044228	C2H2	3e-28	44	81.82
Unigene0089246	Oryza_sativa_subsp._japonica_LOC_Os02g13900.1	BES1	3e-13	34	85.29
Unigene0089305	Physcomitrella_patens_15031	C2H2	6e-14	33	87.88
Unigene0089315	Zea_mays_GRMZM2G180786_P01	MADS	2e-33	75	85.33
Unigene0089328	Arabidopsis_thaliana_AT3G02550.1	LOB	2e-36	64	89.06
Unigene0089364	Oryza_sativa_subsp._indica_OsIBCD013894	MYB	5e-25	59	83.05
Unigene0089383	Vitis_vinifera_GSVIVP00031317001	WRKY	1e-18	43	81.4
Unigene0089391	Populus_trichocarpa_267542	SBP	4e-41	78	85.9
Unigene0089449	Vitis_vinifera_GSVIVP00038759001	MYB-related	2e-42	78	80.77
Unigene0089505	Vitis_vinifera_GSVIVP00000647001	bZIP	########	298	86.24
Unigene0089526	Selaginella_moellendorffii_114141	bHLH	1e-33	70	85.71
Unigene0089584	Sorghum_bicolor_5030761	AP2-EREBP	3e-23	46	93.48
Unigene0089709	Carica_papaya_evm.TU.supercontig_306.1	MYB	0	472	83.47
Unigene0089725	Vitis_vinifera_GSVIVP00014007001	HSF	5e-16	35	94.29
Unigene0089846	Vitis_vinifera_GSVIVP00028351001	ARF	########	210	82.86
Unigene0089888	Zea_mays_AC190635.3_FGP038	zf-HD	1e-11	52	80.77
Unigene0089927	Selaginella_moellendorffii_438143	CCAAT	1e-29	60	85
Unigene0089995	Vitis_vinifera_GSVIVP00026902001	WRKY	2e-46	80	88.75
Unigene0090031	Vitis_vinifera_GSVIVP00023594001	TUB	4e-98	181	80.66
Unigene0090042	Zea_mays_GRMZM2G018266_P02	AP2-EREBP	5e-78	145	86.9
Unigene0090081	Oryza_sativa_subsp._japonica_LOC_Os04g08740.2	Orphans	7e-48	93	90.32
Unigene0090082	Zea_mays_GRMZM2G112947_P08	MADS	3e-45	88	81.82
Unigene0090101	Zea_mays_GRMZM2G044752_P03	HB	1e-54	121	80.17
Unigene0090120	Oryza_sativa_subsp._indica_OsIBCD000751	SET	0	307	86.97
Unigene0090814	Oryza_sativa_subsp._japonica_LOC_Os07g41740.1	Alfin-like	6e-45	105	81.9
Unigene0090815	Oryza_sativa_subsp._japonica_LOC_Os07g41740.1	Alfin-like	2e-70	140	82.86
Unigene0090816	Oryza_sativa_subsp._japonica_LOC_Os07g41740.1	Alfin-like	8e-47	87	86.21
Unigene0090817	Oryza_sativa_subsp._japonica_LOC_Os07g41740.1	Alfin-like	8e-47	87	86.21
Unigene0090818	Oryza_sativa_subsp._japonica_LOC_Os07g41740.1	Alfin-like	2e-70	140	82.86
Unigene0090988	Vitis_vinifera_GSVIVP00023865001	WRKY	1e-48	90	83.33
Unigene0090989	Vitis_vinifera_GSVIVP00023865001	WRKY	9e-49	90	83.33
Unigene0090991	Populus_trichocarpa_573120	SET	1e-65	100	85
Unigene0090992	Populus_trichocarpa_573120	SET	########	252	83.73
Unigene0091008	Populus_trichocarpa_639895	bHLH	4e-46	95	80
Unigene0091013	Vitis_vinifera_GSVIVP00024649001	bHLH	3e-19	46	89.13
Unigene0091014	Vitis_vinifera_GSVIVP00024649001	bHLH	3e-26	61	83.61
Unigene0091088	Oryza_sativa_subsp._japonica_LOC_Os04g46250.1	AP2-EREBP	3e-35	69	88.41
Unigene0091114	Vitis_vinifera_GSVIVP00023696001	IWS1	1e-66	168	83.93
Unigene0091139	Vitis_vinifera_GSVIVP00033654001	GNAT	6e-75	91	86.81
Unigene0091140	Populus_trichocarpa_577212	GNAT	1e-74	126	84.92
Unigene0091149	Zea_mays_GRMZM2G002232_P02	C2C2-GATA	4e-31	63	88.89
Unigene0091150	Zea_mays_GRMZM2G002232_P03	C2C2-GATA	5e-31	63	88.89
Unigene0091152	Physcomitrella_patens_15031	C2H2	4e-25	47	97.87
Unigene0091205	Sorghum_bicolor_4784895	Trihelix	8e-53	95	87.37
Unigene0091253	Vitis_vinifera_GSVIVP00022218001	C3H	6e-25	65	80
Unigene0091398	Arabidopsis_lyrata_473390	GNAT	2e-47	90	83.33
Unigene0091413	Oryza_sativa_subsp._japonica_LOC_Os02g32570.2	SNF2	9e-37	74	90.54
Unigene0091414	Oryza_sativa_subsp._japonica_LOC_Os02g32570.2	SNF2	1e-36	74	90.54
Unigene0091455	Oryza_sativa_subsp._japonica_LOC_Os10g20990.1	MYB-related	6e-48	103	81.55
Unigene0091456	Vitis_vinifera_GSVIVP00018263001	LOB	8e-71	121	88.43
Unigene0091461	Oryza_sativa_subsp._indica_OsIBCD008268	DBP	1e-58	114	80.7
Unigene0091548	Oryza_sativa_subsp._japonica_LOC_Os10g14040.1	FAR1	1e-18	46	86.96
Unigene0091635	Selaginella_moellendorffii_6792	HB	2e-12	39	82.05
Unigene0091657	Sorghum_bicolor_4977953	bZIP	4e-29	58	87.93
Unigene0091675	Carica_papaya_evm.TU.supercontig_28.89	Alfin-like	5e-76	144	85.42
Unigene0091764	Vitis_vinifera_GSVIVP00036383001	mTERF	7e-63	128	82.03
Unigene0091880	Carica_papaya_evm.TU.supercontig_139.43	AP2-EREBP	1e-59	102	89.22
Unigene0091886	Oryza_sativa_subsp._indica_OsIBCD026620	G2-like	1e-25	57	80.7
Unigene0091899	Oryza_sativa_subsp._indica_OsIBCD012399	NAC	9e-67	123	80.49
Unigene0091935	Vitis_vinifera_GSVIVP00020888001	HMG	0	496	82.86
Unigene0091947	Populus_trichocarpa_773249	bHLH	6e-43	86	86.05
Unigene0092000	Vitis_vinifera_GSVIVP00027287001	WRKY	5e-57	142	84.51
Unigene0092033	Arabidopsis_lyrata_495414	Orphans	1e-19	46	86.96
Unigene0092090	Oryza_sativa_subsp._indica_OsIBCD005229	SBP	5e-24	46	91.3
Unigene0092177	Oryza_sativa_subsp._japonica_LOC_Os05g43920.1	ARF	6e-16	33	96.97
Unigene0092278	Arabidopsis_thaliana_AT4G29230.1	NAC	5e-13	42	90.48
Unigene0092384	Carica_papaya_evm.TU.supercontig_5.100	Trihelix	4e-54	92	91.3
Unigene0092391	Populus_trichocarpa_218804	C2C2-Dof	5e-25	43	95.35
Unigene0092430	Vitis_vinifera_GSVIVP00028421001	HB	2e-38	71	83.1
Unigene0092529	Populus_trichocarpa_549314	CCAAT	1e-38	75	84
Unigene0092530	Populus_trichocarpa_826609	PLATZ	3e-85	151	84.11
Unigene0092533	Physcomitrella_patens_88203	G2-like	2e-31	74	82.43
Unigene0092538	Oryza_sativa_subsp._japonica_LOC_Os03g55570.1	SWI/SNF-BAF60b	6e-12	55	80
Unigene0092563	Populus_trichocarpa_555668	G2-like	7e-41	76	88.16
Unigene0092595	Vitis_vinifera_GSVIVP00026902001	WRKY	2e-46	80	88.75
Unigene0092598	Carica_papaya_evm.TU.supercontig_128.39	G2-like	6e-11	34	82.35
Unigene0092623	Populus_trichocarpa_423222	CCAAT	3e-64	117	92.31
Unigene0092668	Selaginella_moellendorffii_56793	WRKY	7e-41	82	82.93
Unigene0092679	Oryza_sativa_subsp._indica_OsIBCD029450	BES1	1e-18	46	95.65
Unigene0092682	Selaginella_moellendorffii_67189	bZIP	5e-14	47	82.98
Unigene0092683	Zea_mays_GRMZM2G058461_P01	G2-like	9e-18	50	82
Unigene0092705	Zea_mays_GRMZM2G139977_P02	TAZ	0	514	81.71
Unigene0092709	Sorghum_bicolor_4859410	SNF2	5e-73	136	90.44
Unigene0092747	Vitis_vinifera_GSVIVP00000647001	bZIP	5e-52	118	87.29
Unigene0092798	Physcomitrella_patens_119930	AP2-EREBP	2e-18	45	80
Unigene0092815	Vitis_vinifera_GSVIVP00015398001	TRAF	########	288	81.6
Unigene0092832	Vitis_vinifera_GSVIVP00025449001	MED7	5e-65	144	88.89
Unigene0092874	Populus_trichocarpa_569483	Orphans	6e-33	62	91.94
Unigene0092899	Vitis_vinifera_GSVIVP00025561001	C3H	6e-67	118	83.05
Unigene0092983	Oryza_sativa_subsp._indica_OsIBCD000751	SET	########	309	81.55
Unigene0092985	Populus_trichocarpa_573000	PHD	########	217	88.48
Unigene0093014	Populus_trichocarpa_298129	WRKY	3e-63	102	89.22
Unigene0093051	Oryza_sativa_subsp._japonica_LOC_Os02g32570.2	SNF2	2e-94	171	83.04
Unigene0093053	Populus_trichocarpa_253757	TCP	3e-17	43	86.05
Unigene0093062	Physcomitrella_patens_48139	Pseudo ARR-B	7e-43	81	86.42
Unigene0093089	Populus_trichocarpa_555627	BES1	4e-36	95	86.32
Unigene0093115	Vitis_vinifera_GSVIVP00019332001	DBP	########	183	86.34
Unigene0093136	Populus_trichocarpa_281841	AP2-EREBP	9e-90	175	89.71
Unigene0093145	Zea_mays_GRMZM2G100872_P01	GNAT	########	261	90.8
Unigene0064274	Vitis_vinifera_GSVIVP00001223001	bHLH	2e-34	66	84.85
